1                    **Circulating Clonally Expanded T Cells Reflect Functions of**  
2                    **Tumor Infiltrating T Cells**

3  
4    Liliana Lucca<sup>1</sup>, Pierre-Paul Axisa<sup>1</sup>, Benjamin Lu<sup>1-2</sup>, Brian Harnett<sup>1</sup>, Shlomit Jessel<sup>2</sup>, Le Zhang<sup>1</sup>,  
5    Khadir Raddassi<sup>1</sup>, Lin Zhang<sup>2</sup>, Kelly Olino<sup>3</sup>, James Clune<sup>3</sup>, Meromit Singer<sup>4,5</sup>, Harriet M.  
6    Kluger<sup>2\*</sup>, David A. Hafler<sup>1,5\*†</sup>

7  
8    **Affiliations:**

9    <sup>1</sup>Departments of Neurology and Immunobiology, Yale School of Medicine, New Haven, CT, USA.

10    <sup>2</sup>Department of Medicine, Yale School of Medicine, New Haven, CT, USA

11    <sup>3</sup>Department of Surgery, Yale School of Medicine, New Haven, CT, USA

12    <sup>4</sup>Dana Farber Cancer Institute, Harvard Medical School, Boston, MA 02115, USA

13    <sup>5</sup>Broad Institute of MIT and Harvard University, Cambridge, MA USA 02142, USA

14    \*These authors contributed equally to the work

15    † Corresponding author: [david.hafler@yale.edu](mailto:david.hafler@yale.edu); Departments of Neurology and Immunobiology, Yale  
16    School of Medicine, 15 York Street, New Haven, CT 06520 [orcid.org/0000-0003-4664-535X](https://orcid.org/0000-0003-4664-535X)

17

18

1 **Running title**

2 Single-cell RNAseq of circulating TILs in Melanoma

3

4 **Summary**

5 Combining transcriptomic and TCR $\alpha\beta$  repertoire analysis of circulating and tumor-infiltrating  
6 CD8 T cells from patients with metastatic melanoma, we identify a blood-based population with  
7 effector properties that reflect those of clonally related tumor-resident T cells.

8

9 **Abstract:**

10 Understanding the relationship between tumor and peripheral immune environments could  
11 allow longitudinal immune monitoring in cancer. Here, we examined whether T cells that share  
12 the same TCR $\alpha\beta$  and are found in both tumor and blood can be interrogated to gain insight into  
13 the ongoing tumor T cell response. Paired transcriptome and TCR $\alpha\beta$  repertoire of circulating and  
14 tumor-infiltrating T cells were analyzed from matched tumor and blood from patients with  
15 metastatic melanoma at the single cell level. We found that in circulating T cells matching clonally  
16 expanded tumor-infiltrating T cells (circulating TILs), gene signatures of effector functions, but  
17 not terminal exhaustion, reflect those observed in the tumor. In contrast, features of exhaustion are  
18 displayed predominantly by T cells present only in tumor. Finally, genes associated with a high  
19 degree of blood-tumor TCR sharing were overexpressed in tumor tissue after immunotherapy.  
20 These data demonstrate that circulating TILs, identified by TCRs shared with T cells in tumors,  
21 have unique transcriptional expression patterns that may have utility for the interrogation of T cell  
22 function in cancer immunotherapy.

## 1 **Introduction**

2 Tumor infiltration by T cells, particularly CD8<sup>+</sup> cells, is a significant prognostic factor in  
3 cancer (reviewed in Barnes and Amir, 2017). Cytotoxic T cells, characterized by lytic granule  
4 components and NK-associated receptors, play a pivotal role in tumor rejection by directly  
5 destroying tumor cells and associated structures in an antigen-specific fashion (Breart et al., 2008;  
6 Schietinger et al., 2013). In contrast, exhausted T cells are defined by sequential loss of effector  
7 functions, limited proliferative potential (Blank et al., 2019; Moskophidis et al., 1993) and  
8 increased, stable expression of co-inhibitory receptors (reviewed in Blank et al., 2019; van der  
9 Leun et al., 2020). Inhibition of co-inhibitory signals has proven highly successful in the treatment  
10 of solid malignancies (Ribas and Wolchok, 2018). Understanding the relationship between tumor  
11 and peripheral immune environments could allow longitudinal immune monitoring in situations in  
12 which tumor biopsies are unfeasible (Cohen and Buchbinder, 2019). Moreover, serial sampling  
13 for predicting and monitoring response to therapy is often necessary when weighing risk/benefit  
14 ratios for continuation of treatment.

15 Here, we analyzed paired transcriptome and TCR $\alpha\beta$  repertoire of circulating and tumor-  
16 infiltrating T cells from matched tumor and blood samples from patients with metastatic melanoma  
17 at the single cell level. We tested the hypothesis that circulating sister clones of clonally expanded  
18 TILs, i.e. clones with matching TCR sequences, can be interrogated to gain insight into the ongoing  
19 T cell response in the tumor. We found that the degree of cytotoxicity of the tumor infiltrate, but  
20 not exhaustion, can be inferred from circulating TILs. The most pronounced features of exhaustion  
21 are consistently displayed by tumor-exclusive clonal T cells. Thus, the degree of TCR repertoire  
22 sharing across tissues predicts the T cell phenotype, and genes associated with a high degree of

1 blood-tumor TCR sharing are overexpressed by tissue-infiltrating T cells after successful  
2 immunotherapy.

3

#### 4 **Results and Discussion**

##### 5 *Detection of clonally-expanded TILs in the circulation of melanoma patients*

6 We analyzed paired transcriptomic and TCR $\alpha\beta$  libraries from a total of 123,868 T cells  
7 derived from matched metastatic tumors and blood from 11 stage IV melanoma patients selecting  
8 subjects with diverse treatment history (Table 1). A single TCR $\alpha\beta$  clonotype (see Methods) could  
9 be detected in 66.1% (48.5% – 76.6%) of the cells, and only these cells were retained for  
10 subsequent analyses. A reduction in the diversity of immune repertoires signals an ongoing  
11 immune response. We computed four estimates of repertoire diversity and compared tumor and  
12 blood repertoires across patients and observed a significant reduction in the richness of clonotype  
13 species in the tumor as calculated by the Chao (Chao et al., 1992) and ACE indexes (Laydon et  
14 al., 2014) (Fig 1A). To identify patterns of similarity, we performed hierarchical clustering based  
15 on clonal size distribution and observed an overall separation of blood and tumor samples with  
16 two tumor samples, Mel UT-2 and Mel T-2, clustering closer to blood samples (Fig. 1B). These  
17 two samples consistently ranked lowest when measuring the proportion of the repertoire occupied  
18 by the top 10 most frequent clonotypes (Fig 1C). Of note, Mel UT-2 was a mucosal melanoma and  
19 therefore sun-shielded (Table 1), consistent with the correlation between UV radiation exposure  
20 and immune infiltration (Wang et al., 2017). These analyses confirmed previous results showing  
21 restricted TCR repertoires in melanoma, indicative of ongoing antigen-specific responses (Kalaora  
22 et al., 2018). We then classified individual TIL clonotypes into clonally expanded or not, based on  
23 the proportion of the repertoire occupied by each clonotype. Because of significant variability in  
24 the number of analyzed TILs across patients (1,127 - 5,404), for this classification we established



1 individual percentage-based thresholds (Fig. S1). We next examined whether sister clones of  
2 expanded TILs could be detected in the blood based on exact clonotype matching. Comparing the  
3 proportion of tumor and blood repertoires occupied by the 20 most expanded TIL clonotypes  
4 highlights the existence of both shared and tumor exclusive large clones (Fig 1D). Based on the  
5 largely mutually exclusive expression of the *CD8A* and *CD4* genes, we found that both tumor-  
6 resident and circulating expanded TILs were disproportionately CD8 (Fig 1E-G). Finally, we  
7 observed a positive correlation between the frequency of circulating TILs in blood, (average 7.5%  
8  $\pm$  10.4%, Fig 1H) and the duration of metastatic disease (Table 1 and Fig 1I).

### 9 *Cytotoxic profile of circulating TILs*

10 We then examined whether clonally expanded T cells in the tumor displayed specific  
11 functional traits by analyzing transcriptional profiles of individual CD8 T cells from all patients  
12 by grouping similar cells into clusters. We identified seventeen clusters (Fig 2A), and clonally  
13 expanded TILs largely map onto clusters overrepresented in the tumor (Fig 2B). We further  
14 annotated each cluster by identifying cluster-specific gene markers (Table S1) and comparing  
15 these markers with gene sets derived from previous studies of the immune infiltrate in melanoma  
16 at the single cell level (Li et al., 2019; Sade-Feldman et al., 2018; Tirosh et al., 2016). A large  
17 subgroup of blood-dominated clusters (6, 13, 16, 8) corresponded to naïve and central memory  
18 CD8 T cells, defined by the high expression of *CCR7* and *IL7R*, overlapping with published  
19 signatures of central memory (Fig 2C-D). Clusters 2 and 12 display both signatures of central and  
20 effector memory, while clusters 3, 9 and 14 express high levels of cytotoxic molecules and cluster  
21 together with previously reported cytotoxic populations (Fig 2C-D). Tumor-dominated clusters 0,  
22 5, 10, 15 were enriched in signatures of exhaustion and terminal differentiation and are indeed  
23 marked by expression of *PDCDI* (Fig 2C-D). Clusters 1, and 11 and presented an intermediate

1 profile, with both signatures of exhaustion and cytotoxicity, and higher expression of *GZMK* than  
2 *GZMB* (Zhang et al., 2019) (Fig 2C-D), possibly representing pre-dysfunctional T cells (Li et al.,  
3 2018). We also identified two clusters of actively proliferating cells (4 and 7), expressing high  
4 levels of *MKI67* and predominantly containing tumor-derived, clonally expanded T cells.

5 In the blood, circulating TILs map to both cytotoxic and pre-dysfunctional clusters. To  
6 further define transcriptional traits associated with this population, we compared transcription  
7 profiles of circulating TILs and other circulating T cells. We detected higher expression of multiple  
8 cytotoxic molecules such as granzymes, perforin and NK-associated receptors, and also markers  
9 of tissue residence (*LGALS1*), migration (*CD99*) and tissue homing (*ITGB7*). Finally, *LAG3*, but  
10 not other coinhibitory receptors, was also significantly upregulated by circulating TILs (Fig 2E).

#### 11 *Tumor signature of circulating TILs*

12  
13 We then examined whether circulating TILs are enriched for features of tumor resident,  
14 clonally expanded TILs. We focused on seven patients where a minimum of 20 circulating TILs  
15 could be detected (Fig 1H). For each patient, we defined expanded TIL gene sets consisting of  
16 genes differentially expressed between clonally expanded TILs and tumor-resident T cells with a  
17 unique TCR (singletons, Fig 3A). Similarly, we compared clonally expanded, blood-derived T  
18 cells (based on thresholds shown in Fig. S2) and blood-derived singletons (Fig 3A). To obtain a  
19 list of genes specifically associated with clonal expansion in the tumor, we incorporated a term for  
20 the interaction between clonal expansion and tissue into the linear model used for differential  
21 expression detection (Fig 3B). This analysis yielded two types of gene sets: those containing all  
22 genes relevant to clonal expansion in the tumor, including hallmarks of general activation  
23 (expanded TIL gene sets), and those containing only genes found exclusively when T cells expand  
24 in the tumor (tumor-specific gene sets, Table S3). We then calculated the overlap between

1 expanded TIL gene sets from individual patients. The expanded TIL gene sets of Met-T-1 and  
2 Mel-T-2, the two patients with BRAF/NRAS/c-kit wild-type tumors, presented a high degree of  
3 overlap and shared multiple markers of cytotoxicity. A high degree of similarity was also observed  
4 for subjects Mel-T-5 and Mel-T-12, enriched for signatures of exhaustion (Fig 3C, Table S3).

5 We then used expanded TIL gene sets to score individual CD8 T cells from the blood, and  
6 compared circulating TILs to other circulating T cells. Circulating TILs indeed had higher levels  
7 of aggregated expression of genes contained in expanded TIL gene sets in six out of seven patients  
8 (Fig 3D). Because expanded TIL gene sets contain multiple markers of activation, and, as shown  
9 in Fig 2A-B, circulating TILs are an effector population, it is possible that this result may just  
10 reflect a difference in activation. Therefore, we also measured the expression of tumor-specific  
11 gene sets in circulating TILs. For four out of seven patients, circulating TILs were also enriched  
12 for tumor-specific gene sets (Fig 3E). To visualize trends of expression of individual genes  
13 upregulated by clonally expanded TILs, we selected genes contained in the expanded TIL modules  
14 of at least three patients and compared differential expression between tumor-resident expanded  
15 TILs, circulating TILs and other circulating T cells. Of 566 genes tested, 283 were more highly  
16 expressed in circulating TILs compared to other circulating T cells, including multiple markers of  
17 effector functions. In contrast, 200 genes had similarly lower expression in blood compared to  
18 tumor regardless of TCR sharing. These genes included inhibitory receptors and other markers of  
19 terminal differentiation (Fig 3F, top 50 genes). Likewise, of 105 genes induced in the tumor-  
20 specific sets of at least two patients, 29 were significantly upregulated in circulating TILs, while  
21 35 were not differentially expressed between blood populations. The tumor-specific genes  
22 reflected in circulating TILs included effector molecules (*IL32*, *IFNG*), enzymes involved in  
23 carbohydrate metabolism (*GAPDH*, *GPI*, *GYGI*) and genes involved in cytoskeleton dynamics

1 (*ACTG*, *MYL6*, *PFNI*, *CFL1*), possibly mediating adaptations required for tissue residency  
2 (Kumar et al., 2017). Tumor-specific genes not reflected in circulating TILs also included some  
3 regulators of cell structure (*TUBA1B*, *TUBB*, *COTL1*), and additional inhibitory molecules  
4 (*HAVCR2*, *CTLA4*) and transcription factors associated with exhaustion (*TOX*) and tissue  
5 residency (*ID2*, Fig 3G). Thus, these data indicate that circulating TILs reflect certain features of  
6 the ongoing T cell response in the tumor including adaptations to tissue residency, but also reveal  
7 that key features of exhaustion in the tumor cannot be inferred from the periphery.

#### 8 *Co-expression of KLRD1 and CD74 enriches for circulating TILs*

9 We then examined whether circulating TILs can be identified in the blood based on  
10 expression of gene markers. We classified circulating CD8 T cells populations based on sharing  
11 of TCRs expanded in the tumor. The transcriptomes of individual cells with this annotation were  
12 used as the input of COMET (Combinatorial Marker Detection from Single-Cell Transcriptomic  
13 data, (Delaney et al., 2019), a tool that uses the minimal hypergeometric test to rank single and  
14 paired gene marker panels from a curated list of surface-expressed genes (Chihara et al., 2018) for  
15 their ability to identify predefined populations (Fig S3A). Of fourteen candidate gene marker pairs  
16 identified in five out of seven patients, the *KLRD1-CD74* module had the highest average rank and  
17 a highly significant q value in most patients (Fig S3B). Moreover, *KLRD1* and *CD74* were also  
18 highly ranked as candidate gene markers of circulating TILs in the single gene marker analysis for  
19 most patients (Fig S3C). We determined whether cells expressing high levels of the *KLRD1-CD74*  
20 module were enriched for circulating TILs. Indeed, selecting for cells that co-express *KLRD1* and  
21 *CD74* genes (Fig S3D) enriches for circulating TILs (Fig S3E). Interestingly, a significantly higher  
22 frequency of circulating TILs could not be found by classifying CD8 T cells by *PDCDI* gene  
23 expression alone (Fig S3F). Analysis of PD-1 expression at the protein level consistently revealed

1 that while tumor-resident expanded TILs display higher levels of both *PDCDI* transcript and PD-  
2 1 protein than unexpanded cells, circulating TILs express similarly low levels of PD-1 as other  
3 circulating T cells (Fig S3G). Overall, these data suggest that it may be possible to identify a  
4 significant proportion of circulating T cells that are clonally related to tumor-resident T cells by  
5 measuring transcripts encoding for cell surface proteins in the absence of TCR sequence  
6 information.

### 7 *Tumor-blood sharing as a predictor of cytotoxic phenotype*

8 Because many markers of exhaustion could not be detected in the circulation, we  
9 hypothesized that these are predominantly expressed by tumor-exclusive clones. To this end, we  
10 grouped CD8 TILs and circulating CD8 T cells into clonal groups, i.e. groups of cells sharing the  
11 same TCR, and calculated expansion and blood-tumor sharing scores for each clonal group.  
12 Mapping the tumor expansion and sharing scores onto the TIL tSNE plot shows clearly that most  
13 highly expanded clonal groups are not highly shared with the blood (Fig 4A-B).

14 We then determined whether gene expression in the tumor is associated with these metrics  
15 by calculating average Spearman's rho coefficients for each gene. The expansion score appears to  
16 be correlated with an activation signature, with markers of naïve cells, (*IL7R*, *CCR7*, *LEF1*)  
17 displaying negative coefficients. Low values of the sharing score, instead, were associated with  
18 markers of exhaustion and terminal differentiation, (*HAVCR2*, *PDCDI*, *CXCL13*, *FABP5*, *IFNG*,  
19 Fig 4A-B). This approach did not allow us to separate the relative contribution of expansion and  
20 degree of sharing to these phenotypes. In fact, cumulative measures calculated for all the expanded  
21 clonal groups of each patient confirm that these two metrics are not independent, but rather  
22 inversely correlated, specifically in the tumor (Fig 4C).

1           To separate the effects of expansion and degree of sharing, we selected clonal groups for  
2           which either of these parameters was constant. Specifically, we identified four clonal group pairs  
3           with similar expansion scores within pairs, and opposite degrees of blood-tumor sharing. Similarly,  
4           we selected six clonal group pairs that were equally tumor exclusive and presented different  
5           degrees of clonal expansion (Fig 4D). We noted that pairs that differ by degree of sharing occupy  
6           distinct areas of the cell space, whereas pairs with variable expansion scores all map to the same  
7           area (Fig 4E-F). This difference could be quantified by calculating the average Euclidean distances  
8           for each clonal group pair. Indeed, the distances between exclusive versus shared clonal groups  
9           were significantly larger than the ones between highly versus lowly expanded clonal groups (Fig  
10          4G). These data indicate that in the tumor infiltrate, the degree of sharing with blood explains more  
11          variation than the degree of clonal expansion. Moreover, we identified differentially expressed  
12          genes among cells belonging to these clonal groups and were able to confirm that TILs with a TCR  
13          shared with blood T cells were highly enriched for signatures of central memory and cytotoxicity,  
14          and presented less features of terminal exhaustion (Fig 4H).

15          As we demonstrated that circulating TILs express cytotoxic genes but low levels of  
16          exhaustion markers, we examined whether the cytotoxic score of circulating TILs was predictive  
17          of the cytotoxic score of the tumor infiltrate of the same patient. We scored individual tumor-  
18          derived CD8 TILs and circulating TILs for expression of a set of cytotoxicity markers previously  
19          reported in tumor-infiltrate T cells in single-cell RNAseq-based studies of multiple human cancers  
20          (see Methods and van der Leun et al., 2020). We observed a significant direct correlation between  
21          cytotoxicity scores in the tumor versus the circulating TIL population (Fig 4I). Moreover, this was  
22          not the case when scoring tumor-derived and circulating TILs for an exhaustion signature (Fig 4I),

1 indicating that the degree of cytotoxicity of the tumor infiltrate, but not exhaustion, can be inferred  
2 from the periphery by analyzing circulating TILs.

### 3 *Signature of shared clones in the tissue of responders*

4 It has been recently reported that clinical response to immunotherapy is accompanied by  
5 an influx of new T cell clones from the periphery into the tumor microenvironment, suggesting  
6 that TILs with a high degree of TCR sharing with blood can be involved in tumor rejection (Yost  
7 et al., 2019). To address this, we classified expanded TILs from the immunotherapy naïve patient  
8 Mel-T-1 into shared with blood or tumor exclusive, and scored individual cells for gene sets  
9 associated with response or disease progression after checkpoint immunotherapy (Sade-Feldman  
10 et al., 2018). While tumor exclusive TILs resembled TILs of progressors, genes predicting  
11 response were more represented in TILs shared with blood (Fig 5A-B). Furthermore, we examined  
12 whether defining sets of genes based on their correlation with the degree of blood-tumor sharing  
13 (Table S4) was sufficient to identify genes relevant to tumor rejection after immunotherapy. We  
14 analyzed residual tissue from two patients whose tumors responded clinically to checkpoint  
15 inhibitor immunotherapy. These samples did not contain any discernible tumor tissue, but rather  
16 focal aggregation of inflammatory cells including T cells and activated macrophages. We refer to  
17 these as tissue-infiltrating T cells. Similar to what we observed for tumor recurrent patients, in the  
18 two responder samples, less than 25% of tissue-infiltrating T cells carried a clonally expanded  
19 TCR (Fig 5C). We then analyzed the expression of genes that we had previously established to be  
20 associated with blood-tumor sharing or tumor-exclusivity in the tissue (Fig 4A, Table S5). Genes  
21 positively correlated with blood-tumor sharing were highly expressed in the clusters dominated by  
22 clonally expanded tissue-infiltrating T cells (Fig 5D-E). These included cytotoxic effector  
23 molecules and receptors (*GNLY*, *GZMH*, *GZMM*, *KLRD1*). Contrary to patients with recurrent

1 disease, clonally expanded tissue-infiltrating T cells did not express high levels of co-inhibitory  
2 receptors (*TIGIT*, *HAVCR2*, *PDCD1*, *CTLA4*) and other markers of exhaustion (*TOX*, *TOX2*,  
3 *CXCL13*) that we demonstrated to be negatively correlated with the blood-tumor sharing score  
4 (Fig 5D-E). Overall, these results suggest that genes positively correlated with the degree of blood-  
5 tumor sharing mark T cells that are involved in tumor rejection in response to immunotherapy.

6         Recent development in single-cell RNAseq technology has significantly improved our  
7 understanding of the relationship between TCR identity and functional properties. A number of  
8 studies have analyzed the overlap between TCR repertoires of discrete TIL clusters to examine  
9 developmental continuity across functional states (Tirosh et al., 2016; Li et al., 2019; Azizi et al.,  
10 2018). Here, we show that the degree of TCR overlap between the distinct tumor and blood tissue  
11 compartments can be indicative of the functional state of TILs. Specifically, we show that tumor-  
12 derived T cells belonging to TCR clonal groups highly shared across tumor and blood display the  
13 highest cytotoxic signatures in the tumor. Of note, circulating sister clones of these TILs also  
14 display cytotoxic functions proportionally to what is observed in the tumor, suggesting that  
15 analysis of circulating TILs could be used to predict effector functions in the tumor. Previous work  
16 using similar approaches in various cancers indicate that cytotoxicity represents one of two main  
17 developmental states of CD8 TILs, the other being T cell exhaustion (Zheng et al., 2017; Guo et  
18 al., 2018; Zhang et al., 2018; Azizi et al., 2018). These two phenotypes are conceptualized as the  
19 extremes in a bifurcation developmental model, where T cells belonging to the same clonal group  
20 tend to follow one or the other differentiation pathway. We consistently observe that cytotoxic and  
21 exhaustion phenotypes were also dichotomously associated with the pattern of TCR sharing across  
22 blood and tumor; while cytotoxic sister clones can be found in both tumor and blood, the most  
23 exhausted clonal groups appear to be tumor exclusive.



1           That the pattern of TCR sharing recapitulates CD8 T cell differentiation has a number of  
2 implications. In regard to the natural history of the antigen-specific response in the tumor, our data  
3 suggest that an exhausted phenotype is more likely to arise in T cells that have been primed locally  
4 in the tumor compared to central memory T cells seeded from the periphery. Indeed, tumor  
5 microenvironments contain antigen presenting cells that are unfit for priming T cell responses,  
6 partly as a consequence of interactions with regulatory T cells (Wolf et al., 2015; Magnuson et al.,  
7 2018).

8           The most exhausted TILs belong to tumor-exclusive clonal groups, implying that features  
9 of exhaustion cannot be inferred by analyzing circulating TILs. Nevertheless, it is known that  
10 tumor-resident exhausted T cells have only modest potential for functional reinvigoration, partly  
11 due to hard-wired epigenetic changes (Jadhav et al., 2019; Ghoneim et al., 2017; Pauken et al.,  
12 2016). Recent work has established that in metastatic melanoma patients, clinical response to  
13 checkpoint inhibition immunotherapy is associated with peripheral expansion of large clonal  
14 groups expressing high levels of cytotoxic and effector markers, with strong overlap with genes  
15 that we found to be associated with a high degree of blood-tumor sharing (Fairfax et al., 2020).  
16 This observation would suggest that circulating TILs contribute to response to immunotherapy,  
17 although the specificity of this population for tumor antigens remains to be demonstrated.  
18 Moreover, a study of basal cell carcinoma lesions sampled before and after anti-PD1 therapy found  
19 that pre-existing exhausted TILs were largely replaced by novel expanded clonotypes, reinforcing  
20 the idea that exhausted clonal groups might be short-lived and unlikely to participate in long-term  
21 immune surveillance (Yost et al., 2019). We report that gene associated with high degree of blood-  
22 tumor sharing are enriched for effector signatures. Consistently, a recent meta-analysis of four  
23 clinical trials of an anti-PD-L1 antibody (atezolizumab) in a variety of solid tumors found that in

1 the tumor, gene signatures associated with clonotypes that were expanded in both tumor and  
2 normal adjacent tissue predicted a better response to anti-PD-L1 (Wu et al., 2020).

3 As we wished to examine the circulating TILs in a variety of clinical settings, we did not  
4 select patients by prior exposure to immunotherapy or variability in clinical presentation. We thus  
5 were able to focus on findings that were reproducible in the patients analyzed, with the goal that  
6 these findings could be further corroborated in larger, uniformly treated patient cohorts. While we  
7 have further shown that it could be possible to enrich for circulating TILs by analyzing co-  
8 expression of genes encoding for surface markers, critical validation steps are required for  
9 implementation into a scalable immune monitoring assay. Nevertheless, we note that, in a  
10 companion paper by Pauken et al., circulating TILs could be identified by the expression of a set  
11 of gene markers partially overlapping with the ones that we found. The authors describe a  
12 combination of four negation markers (*CCR7*, *FLT3LG*, *LTB*, and *GYPC*) that allows for  
13 enrichment of circulating TILs in treatment naïve metastatic melanoma patients. Indeed, three of  
14 these markers were also highly significantly associated with circulating TILs in our dataset in the  
15 two patients with the highest frequency of circulating TILs. Therefore, it appears that the approach  
16 of using the TCR as a molecular barcode for circulating TILs followed by an unbiased search for  
17 candidate markers can return the same genes across distinct patient cohorts and independent  
18 laboratories. Finally, we could not assess the directionality of circulating TILs with respect to their  
19 tumor-resident sister clones to determine whether circulating TILs include cells that have left the  
20 tumor bed and re-entered the circulation. This possibility has been described for tissue-resident  
21 memory T cells in the skin: a subset of these cells can enter the circulation, where they remain  
22 transcriptionally representative of the skin-resident population (Klicznik et al., 2019). Additional  
23 work is required to assess if a similar phenomenon also occurs in cancer, and whether related

1 clonal T cells can sequentially patrol multiple metastases, including tissues to which immune cell  
2 trafficking is tightly regulated, such as the central nervous system.

3 In conclusion, we propose that in human cancer the pattern of TCR repertoire sharing  
4 across tissues recapitulates T cell differentiation states. Moreover, we report that it is possible to  
5 assess the ongoing immune response in the tumor by analyzing a circulating T cell population.  
6 Further work is necessary to better define circulating TILs as blood-based biomarkers to increase  
7 the precision of existing ‘liquid biopsy’ assays.

8

## 1 **Author contributions**

2 L.E.L. planned and performed experiments, analyzed data and wrote the manuscript with inputs  
3 from P-P. A., B.L., B.H., J.S., M.S., H.K. and D.A.H; P-P. A. and B.L. analyzed data; B.H.  
4 performed experiments, L.Z. and K.R. provided technical help with single-cell genomics; L.Z.  
5 provided technical help with sample acquisition; K.O. and J.C. harvested patient tissue samples,  
6 S.J. collected and reviewed patient clinical information; M.S. oversaw data analysis; L.E.L., M.S.,  
7 H.K. and D.A.H. conceptualized the study; H.K. and D.A.H. planned and supervised the study and  
8 acquired funding.

## 9 **Acknowledgements**

10 The authors would like to thank Lesley Devine and Chao Wang for technical assistance with flow  
11 cytometry, Guilin Wang and the staff of the Yale Center for Genome Analysis for technical  
12 assistance with single cell genomics, and Antonella Bacchiocchi from the Yale SPORE in Skin  
13 Cancer Biospecimen Core for assistance with sample collection. The authors would also like to  
14 thank Philip Coish and Jessica Wei for help with manuscript preparation and Matthew Lincoln and  
15 Rahul Dhodapkar for insightful comments on data analysis.

## 16 **Funding Sources:**

17 This work was supported by NIH grant P50 CA121974 (to Harriet Kluger and Marcus Bosenberg).  
18 and NIH grants P01 AI073748, U24 AI11867, R01 AI22220, UM 1HG009390, P01 AI039671,  
19 P50 CA121974, R01 CA227473) to DAH.

## 20 **Conflicts of interest**

21 Though we believe that none of these relationships are conflicts of interest, Dr. Hafler has received  
22 research funding from Bristol-Myers Squibb, Sanofi, and Genentech for work unrelated to this  
23 project. He has been a consultant over the past ten years for Bristol Myers Squibb, Compass

1 Therapeutics, EMD Serono, Genentech, Juno therapeutics, Novartis Pharmaceuticals, Proclara  
2 Biosciences, Sage Therapeutics, and Sanofi Genzyme. Dr. Kluger has received research funding  
3 from Bristol-Myers Squibb, Apexigen and Merck. She has been a consultant for Corvus, Biodesix,  
4 Roche-Genentech, Pfizer, Iovance, Immunocore, Celldex, Array Biopharma, Merck, Elevate Bio  
5 and Instil Bio.

6

7

## 1 **Materials and Methods**

### 2 *Human subjects*

3 This study was approved by the Yale University Institutional Review Boards. All participants  
4 provided written informed consent for the study. All patients had histologically confirmed Stage  
5 IV metastatic melanoma. Surgical resection was clinically indicated in all cases. Patients donated  
6 a portion of surgically resected tissue (for TIL isolation) and a time-matched blood sample (for  
7 PBMC isolation).

### 8 *Tumor dissociation and PBMC isolation*

9 Freshly resected tumor samples were mechanically dissociated and digested in HBSS medium with  
10 Collagenase IV (2.5 mg/mL) and DNase I (0.2 mg/mL) (Worthington Biochemical Corporation)  
11 at 37°C for 30 minutes. TIL-enriched single cell suspensions were then isolated using Lymphoprep  
12 gradient centrifugation. PBMCs were isolated from whole blood using Lymphoprep gradient  
13 centrifugation. For sample Mel-T-9, TILs and PBMCs were cryopreserved in GemCell human AB  
14 serum with 10% DMSO in liquid nitrogen. For sample Mel-T-11, cryopreserved TILs and PBMCs  
15 were kindly provided by the Advanced Cell Therapy Laboratory in the Department of Laboratory  
16 Medicine (Yale School of Medicine).

### 17 *Cell sorting*

18 All samples but Mel-T-9 and Mel-T-11 were sorted directly after PBMC and TIL isolation. For  
19 sample Mel-T-9 and Mel-T-11, cryopreserved TIL and PBMC aliquots were thawed following  
20 the protocol CG00039 from 10X Genomics (<https://support.10xgenomics.com/>). Samples were  
21 sorted on a BD FACS Aria II using a live cell (Live/Dead Cell Viability Assay, Life  
22 Technologies), CD45+ (eBioscience, PerCP-Cy5.5 conjugated), TCR $\alpha\beta$ + (eBioscience, PE-Cy7

1 conjugated) gating strategy. At least 5,000 live T cells were sorted per sample for inclusion in the  
2 10X library preparation.

### 3 *Preparation of scRNAseq and scTCRseq libraries*

4 Sorted T cell samples were centrifuged at 300 rcf for 10 minutes at 4°C, resuspended in PBS with  
5 0.04% BSA and counted on a hemocytometer. Cell concentrations were adjusted to be between  
6 700 and 1,000 cells/ $\mu$ L. Paired single-cell gene expression and TCR libraries were prepared and  
7 sequenced at the Yale Center for Genome Analysis following standard protocols from 10X  
8 genomics (<https://medicine.yale.edu/keck/ycga/sequencing/10x/singcellsequencing/>). Briefly,  
9 single cells were isolated in 1 nanoliter GEMs (Gel Bead in Emulsion), using the GemCode  
10 technology. Depending on the initial cellularity of the sorted samples, between 5,000 and 10,000  
11 cells were targeted. Cell barcoding, lysis, and reverse transcription of mRNA occurred within each  
12 GEM. cDNA libraries were then generated using next-generation sequencing PCR amplification  
13 with the 5-prime chemistry. Both scRNAseq libraries and scTCRseq libraries were generated for  
14 each sample.

### 15 *CITE-seq staining*

16 Sorted live/CD45<sup>+</sup>/TCR $\alpha$  $\beta$ <sup>+</sup> cells derived from blood and tumor samples were incubated with 0.5  
17  $\mu$ g/sample of the following antibody mix:  $\alpha$ CD4 clone RPA-T4,  $\alpha$ CD8a clone RPA-T8,  $\alpha$ PD-1  
18 clone EH12.2H7 (all from BioLegend, conjugated with TotalSeq<sup>TM</sup> oligos) in PBS:BSA 0.1% for  
19 30 minutes on ice. Stained cells were centrifuged at 300 rcf for 10 minutes at 4°C, resuspended in  
20 PBS with 0.04% BSA, counted on a hemocytometer and used for preparation of paired scRNA-  
21 seq, scTCR-seq and scCITE-seq libraries, as described above.

22

## 1 *Sequencing*

2 scRNAseq libraries were sequenced on an Illumina NovaSeq S4 instrument at a read length of  
3 26x8x91 base pairs and at a depth of 300 million reads per sample. CITE-seq libraries were also  
4 sequenced on at a read length of 26x8x91 base pairs and at a depth of 30 million reads per sample  
5 scTCRseq libraries were sequenced on an Illumina NovaSeq S4 at a read length of 150x150 base  
6 pairs and at a depth of 20 million reads per sample.

## 7 *Data processing of scRNAseq and scTCRseq libraries*

8 ScRNAseq reads were aligned to the reference genome GRCh38 using the cellranger count  
9 pipeline from the CellRanger software v3.0.2 (10X Genomics). The mean number of reads per cell  
10 was 49,499 (28,471 – 103,776) for blood T cell samples, and 92,357 (43,243 – 283,598) for tumor  
11 T cell samples. The median number of unique molecular identifiers (UMI) per cell was 4,383  
12 (2,624 – 5,820) for blood and 3,960 (2,440 – 4,836) for tumor samples. The median number of  
13 unique genes per cell was 1,444 (1,105 – 1,802) for blood and 1,465 (1,060 – 1791) for tumor  
14 samples. Filtered gene-barcode matrices containing barcodes that had passed the threshold for cell  
15 detection were used for downstream analyses.

16 ScTCRseq reads were processed using the cellranger vdj pipeline from CellRanger v3.0.2 (10X  
17 Genomics, reference genome GRCh38). The mean number of read pairs per cell was 4,792 (1,358  
18 – 10,040) for blood-derived TCR libraries and 6,442 (1,765 – 27,411) for tumor-derived TCR-  
19 libraries. The VDJ enrichment, defined as the percentage of reads mapping to any VDJ gene, was  
20  $89\% \pm 2.4$  for blood and  $90\% \pm 2.58$  for tumor. TCR contigs called by cellranger vdj with high  
21 confidence, listed in the filtered\_contig\_annotations.csv output file, were retained for downstream  
22 analyses. Nucleotide and amino acid CDR3 $\alpha$  and  $\beta$  sequences and count matrices of gene



1 expression were matched for each cell based on barcode identities using custom R scripts and  
2 imported into Seurat v3.0 ([www.satijalab.org/seurat/](http://www.satijalab.org/seurat/)). When more than one CDR3 $\alpha$  and  $\beta$   
3 sequence was found for a given cell, additional sequences were appended, while NA values were  
4 assigned for missing sequences. For downstream analyses, all cells for which multiple CDR3 $\alpha$   
5 and  $\beta$  sequences existed or NA values were present were removed from the dataset.

## 6 *Cluster analysis*

7 Cell-level quality control was performed for individual patients and for blood and tumor gene  
8 expression matrices separately. Thresholds for removing low-quality cells were selected based on  
9 the distribution of the number of unique genes per cell and the percentage of genes that map to the  
10 mitochondrial genome. On average, cells that expressed between 258 and 3,896 unique genes and  
11 with a percentage of mitochondrial reads below 13.75% were retained for downstream analyses.

12 For the cluster analysis, we filtered out T cell receptor genes and genes encoded by the Y  
13 chromosome and selected for cells with  $CD8A$  count  $\geq 1$  and  $CD3E + CD3D + CD3G \geq 1$ . We  
14 then joined count matrices from individual patients to generate one merged Seurat object for blood-  
15 derived cells and one for tumor-derived cells. Counts were log-normalized and 2,000 variable  
16 genes were identified for blood and tumor separately using the Seurat function  
17 `FindVariableFeatures` with the “vst” method (variance stabilizing transformation). Tumor and  
18 blood datasets were subsequently integrated into a single dataset using the Seurat functions  
19 `FindIntegrationAnchors` and `IntegrateData` using 20 dimensions. For the resulting integrated  
20 object, scaled z-scores for each gene were computed using the `ScaleData` function and regressed  
21 against sequencing batch and fresh or frozen processing. Principal component analysis was then  
22 run to identify 30 principal components, of which the first 8 were selected for t-SNE  
23 dimensionality reduction using the elbow method on the distribution of the standard deviation of

1 each PC. For clusters identification, we initially used the FindNeighbors function to build a shared  
2 nearest neighbor graph based on the k-nearest neighbor of each cell, with  $k = 5$ . Clusters are then  
3 determined with the FindClusters function, which uses the Louvain algorithm for modularity  
4 optimization (ref, resolution = 0.4). Markers of individual clusters were defined as the  
5 differentially expressed genes between cells belonging to each cluster versus every other cell using  
6 the Wilcoxon Rank Sum test as implemented in the function FindMarkers. Genes with an adjusted  
7 p value  $< 0.05$  were retained.

#### 8 *TCR $\alpha\beta$ repertoire analysis*

9 The TCR $\alpha\beta$  repertoires of blood and tumor samples were analyzed using scRepertoire  
10 (Borcherding et al., 2020). Filtered contig annotation files from the output of cellranger vdj were  
11 used as input. Indexes of diversity (Shannon entropy, Inverted Simpson) and species richness  
12 (Chao, ACE) were calculated using the clonalDiversity function (cloneCall = "aa") and the  
13 significance of group differences was tested with the Wilcoxon rank-sum test. Hierarchical  
14 clustering of samples based on clone size distribution was performed with the function  
15 clonesizeDistribution (cloneCall = "aa") derived from the package PowerTCR (Koch et al., 2018).  
16 The proportion of occupied repertoire space was plotted using the function clonalProportion  
17 (cloneCall = "aa") and alluvial plots were generated with compareClonotypes after selecting the  
18 top 20 most expanded clonotypes in the tumor.

19 To obtain a binary definition of clonal expansion, thresholds were selected by inspection of  
20 histograms displaying the percentage of the tumor TCR $\alpha\beta$  repertoire occupied by a given  
21 clonotype on the y axis, and individual TIL clonotypes ordered by increasing percentage of the  
22 tumor TIL repertoire on the x axis to identify a knee of the curve.

## 1 *TIL expanded gene set analysis*

2 Gene sets of clonally expanded TILs were calculated for each individual patient. To determine  
3 which genes are specifically associated with T cell expansion in the tumor we modeled raw gene  
4 counts in a generalized linear model as implemented in DESeq2 (Love et al., 2014) including an  
5 interaction term between the expansion and the tissue variable:  
6  $\sim$ Tissue+Expansion+Tissue:Expansion. We ran our model on T cells from each patient separately,  
7 using a local fit. To generate expanded TIL gene sets, we filtered genes with  
8  $\log_2\text{FoldChange\_tumor} > 0$  at an adjusted p value  $< 0.1$ . To generate tumor-specific gene sets, we  
9 filtered genes with  $\log_2\text{FoldChange\_tumor} > 0$  at an adjusted p value  $< 0.1$  and  
10  $\log_2\text{FoldChange\_interaction} > 0$  at an adjusted p value  $< 0.1$ . We then used the function  
11 `AddModuleScore` with default parameters to calculate the average expression of each gene set on  
12 single cells from the blood, for each patient. Blood cells were annotated based on TCR identity as  
13 circulating TILs (those with a TCR found to be above the threshold for clonal expansion in the  
14 tumor) and or not. Statistical significance of the difference between the means of each group of  
15 cells was established for each patient using the Wilcoxon rank-sum test.

## 16 *COMET analysis*

17 The input of the COMET analysis consisted of log-normalized counts of CD8 T cells from the  
18 blood of individual patients. Each cell was annotated as having or not a TCR clonally expanded in  
19 the tumor. Expression matrices and cell identity annotations were uploaded to  
20 <http://www.cometsc.com/comet> and comet was run with default parameters. For each patient, we  
21 obtained an output file containing lists of gene pairs ranked by their power to identify circulating  
22 TILs. We joined these lists by the gene pair identity and filtered out all gene pairs that were not  
23 detected in at least 5 out of 7 patients. For the remaining gene pairs, we calculated an average rank

1 and ordered them by decreasing values of the average rank, the highest of which corresponded to  
2 the gene pair *KLRD1-CD74*.

### 3 *Expansion and blood-tumor sharing score*

4 At the clonotype level, the expansion score (Fig 4B) was defined as follows. For each clonotype,  
5 we calculated the percentage of the total tumor T cell infiltrate occupied by cells sharing that same  
6 clonotype (clonal groups). The patient-level expansion score, as displayed in Fig 4C, was  
7 calculated by adding up the expansion scores of individual clonal groups that were identified as  
8 clonally expanded as exemplified in Fig 1A. Separate patient-level expansion scores were  
9 calculated for blood and tumor. The sharing score of individual tumor-expanded TCRs (Fig 4A)  
10 was defined as the percentage of cells in each clonal group that were also found in blood. For  
11 blood-expanded TCRs, the sharing score was a measure of the frequency of cells with that TCRs  
12 that were also found in the tumor infiltrate. At the patient-level, the degree of sharing was  
13 calculated by averaging the sharing score of individual clonal groups that were identified as  
14 clonally expanded as exemplified in Fig 1A. Separate patient-level sharing scores were calculated  
15 for blood and tumor.

### 16 *Exhaustion and cytotoxicity gene signatures*

17 Consensus markers of exhaustion and cytotoxicity were obtained from a recent review of CD8  
18 states in human cancer (van der Leun et al., 2020). Specifically, the exhaustion gene set included  
19 *HAVCR2, IFNG, ITGAE, PDCD1, CXCL13, LAYN, LAG3, TIGIT, CTLA4, ENTPD1*, while the  
20 cytotoxicity gene set consisted of *CX3CR1, PRF1, GZMA, GZMH, GNLY, FGFBP2, KLRG1,*  
21 *GZMM, LYAR, TXNIP, FCRL6, NKG7, KLRD1*. We then used the function `AddModuleScore` with  
22 default parameters to calculate the average expression of each gene set on single cells. For each

1 patient, we averaged the exhaustion and cytotoxicity scores of all tumor-infiltrating CD8 T cells  
2 and circulating TILs.

3

4

5

## 6 **Supplementary Materials**

7 Fig. S1 Individual thresholds of clonal expansion in the tumor.

8 Fig. S2 Individual thresholds of clonal expansion in the blood.

9 Fig. S3 Co-expression of KLRD1 and CD74 enriches for circulating TILs.

10 Table S1 Top 10 marker genes for each cluster, with percentage of positive cells in the cluster of  
11 interest, delta percentage of positive cells between that cluster and the rest of the dataset,  
12 and adjusted p-value.

13 Table S2 List of gene marker pairs of circulating TILs found in at least five out of seven patients,  
14 with rank and q value for each patient.

15 Table S3 Expanded TIL gene sets and tumor-specific gene sets for each patient.

16 Table S4 List of correlation coefficients between genes and expansion score, filtered for  $-\text{LogP} \geq$   
17 100. Same for sharing score.

18 Table S5 Amino acid and nucleotide sequences of the TCR $\alpha\beta$  CDR3 regions of clonotypes  
19 displayed in Figure 4.

20

## References

- Azizi, E., A.J. Carr, G. Plitas, A.E. Cornish, C. Konopacki, S. Prabhakaran, J. Nainys, K. Wu, V. Kiseliovas, M. Setty, K. Choi, R.M. Fromme, P. Dao, P.T. McKenney, R.C. Wasti, K. Kadaveru, L. Mazutis, A.Y. Rudensky, and D. Pe'er. 2018. Single-Cell Map of Diverse Immune Phenotypes in the Breast Tumor Microenvironment. *Cell*. 174:1293-1308.e36. doi:10.1016/j.cell.2018.05.060.
- Barnes, T.A., and E. Amir. 2017. HYPE or HOPE: the prognostic value of infiltrating immune cells in cancer. *Br. J. Cancer*. 117:451–460. doi:10.1038/bjc.2017.220.
- Blank, C.U., W.N. Haining, W. Held, P.G. Hogan, A. Kallies, E. Lugli, R.C. Lynn, M. Philip, A. Rao, N.P. Restifo, A. Schietinger, T.N. Schumacher, P.L. Schwartzberg, A.H. Sharpe, D.E. Speiser, E.J. Wherry, B.A. Youngblood, and D. Zehn. 2019. Defining “T cell exhaustion.” *Nat. Rev. Immunol.* 19:665–674. doi:10.1038/s41577-019-0221-9.
- Borcherding, N., N.L. Bormann, and G. Kraus. 2020. scRepertoire: An R-based toolkit for single-cell immune receptor analysis. *F1000Research*. 9:47. doi:10.12688/f1000research.22139.2.
- Breart, B., F. Lemaître, S. Celli, and P. Bousso. 2008. Two-photon imaging of intratumoral CD8+ T cell cytotoxic activity during adoptive T cell therapy in mice. *J. Clin. Invest.* 118:1390–1397. doi:10.1172/JCI34388.
- Chao, A., S.M. Lee, and S.L. Jeng. 1992. Estimating population size for capture-recapture data when capture probabilities vary by time and individual animal. *Biometrics*. 48:201–216.
- Chihara, N., A. Madi, T. Kondo, H. Zhang, N. Acharya, M. Singer, J. Nyman, N.D. Marjanovic, M.S. Kowalczyk, C. Wang, S. Kurtulus, T. Law, Y. Etminan, J. Nevin, C.D. Buckley, P.R. Burkett, J.D. Buenrostro, O. Rozenblatt-Rosen, A.C. Anderson, A. Regev, and V.K. Kuchroo. 2018. Induction and transcriptional regulation of the co-inhibitory gene module in T cells. *Nature*. 558:454–459. doi:10.1038/s41586-018-0206-z.
- Cohen, J.V., and E.I. Buchbinder. 2019. The Evolution of Adjuvant Therapy for Melanoma. *Curr Oncol Rep*. 21:106. doi:10.1007/s11912-019-0858-3.
- Delaney, C., A. Schnell, L.V. Cammarata, A. Yao-Smith, A. Regev, V.K. Kuchroo, and M. Singer. 2019. Combinatorial prediction of gene-marker panels from single-cell transcriptomic data. *bioRxiv*. 655753. doi:10.1101/655753.
- Dysfunctional CD8 T Cells Form a Proliferative, Dynamically Regulated Compartment within Human Melanoma. *Cell*. 176:775-789.e18. doi:10.1016/j.cell.2018.11.043.
- Eisenhauer, E.A., P. Therasse, J. Bogaerts, L.H. Schwartz, D. Sargent, R. Ford, J. Dancey, S. Arbuck, S. Gwyther, M. Mooney, L. Rubinstein, L. Shankar, L. Dodd, R. Kaplan, D. Lacombe, and J. Verweij. 2009. New response evaluation criteria in solid tumours: revised RECIST guideline (version 1.1). *Eur. J. Cancer*. 45:228–247. doi:10.1016/j.ejca.2008.10.026.

Fairfax, B.P., C.A. Taylor, R.A. Watson, I. Nassiri, S. Danielli, H. Fang, E.A. Mahé, R. Cooper, V. Woodcock, Z. Traill, M.H. Al-Mossawi, J.C. Knight, P. Klenerman, M. Payne, and M.R. Middleton. 2020. Peripheral CD8<sup>+</sup> T cell characteristics associated with durable responses to immune checkpoint blockade in patients with metastatic melanoma. *Nat. Med.* 26:193–199. doi:10.1038/s41591-019-0734-6.

Gershenwald, J.E., R.A. Scolyer, K.R. Hess, V.K. Sondak, G.V. Long, M.I. Ross, A.J. Lazar, M.B. Faries, J.M. Kirkwood, G.A. McArthur, L.E. Haydu, A.M.M. Eggermont, K.T. Flaherty, C.M. Balch, J.F. Thompson, and for members of the American Joint Committee on Cancer Melanoma Expert Panel and the International Melanoma Database and Discovery Platform. 2017. Melanoma staging: Evidence-based changes in the American Joint Committee on Cancer eighth edition cancer staging manual. *CA Cancer J Clin.* 67:472–492. doi:10.3322/caac.21409.

Ghoneim, H.E., Y. Fan, A. Moustaki, H.A. Abdelsamed, P. Dash, P. Dogra, R. Carter, W. Awad, G. Neale, P.G. Thomas, and B. Youngblood. 2017. De Novo Epigenetic Programs Inhibit PD-1 Blockade-Mediated T Cell Rejuvenation. *Cell.* 170:142-157.e19. doi:10.1016/j.cell.2017.06.007.

Guo, X., Y. Zhang, L. Zheng, C. Zheng, J. Song, Q. Zhang, B. Kang, Z. Liu, L. Jin, R. Xing, R. Gao, L. Zhang, M. Dong, X. Hu, X. Ren, D. Kirchhoff, H.G. Roider, T. Yan, and Z. Zhang. 2018. Global characterization of T cells in non-small-cell lung cancer by single-cell sequencing. *Nat. Med.* 24:978–985. doi:10.1038/s41591-018-0045-3.

Jadhav, R.R., S.J. Im, B. Hu, M. Hashimoto, P. Li, J.-X. Lin, W.J. Leonard, W.J. Greenleaf, R. Ahmed, and J.J. Goronzy. 2019. Epigenetic signature of PD-1<sup>+</sup> TCF1<sup>+</sup> CD8 T cells that act as resource cells during chronic viral infection and respond to PD-1 blockade. *Proc. Natl. Acad. Sci. U.S.A.* 116:14113–14118. doi:10.1073/pnas.1903520116.

Kalaora, S., Y. Wolf, T. Feferman, E. Barnea, E. Greenstein, D. Reshef, I. Tirosh, A. Reuben, S. Patkar, R. Levy, J. Quinkhardt, T. Omokoko, N. Qutob, O. Golani, J. Zhang, X. Mao, X. Song, C. Bernatchez, C. Haymaker, M.-A. Forget, C. Creasy, P. Greenberg, B.W. Carter, Z.A. Cooper, S.A. Rosenberg, M. Lotem, U. Sahin, G. Shakhar, E. Ruppin, J.A. Wargo, N. Friedman, A. Admon, and Y. Samuels. 2018. Combined Analysis of Antigen Presentation and T-cell Recognition Reveals Restricted Immune Responses in Melanoma. *Cancer Discov.* 8:1366–1375. doi:10.1158/2159-8290.CD-17-1418.

Klicznik, M.M., P.A. Morawski, B. Höllbacher, S.R. Varkhande, S.J. Motley, L. Kuri-Cervantes, E. Goodwin, M.D. Rosenblum, S.A. Long, G. Brachtel, T. Duhon, M.R. Betts, D.J. Campbell, and I.K. Gratz. 2019. Human CD4<sup>+</sup>CD103<sup>+</sup> cutaneous resident memory T cells are found in the circulation of healthy individuals. *Sci Immunol.* 4. doi:10.1126/sciimmunol.aav8995.

Koch, H., D. Starenki, S.J. Cooper, R.M. Myers, and Q. Li. 2018. powerTCR: A model-based approach to comparative analysis of the clone size distribution of the T cell receptor repertoire. *PLOS Computational Biology.* 14:e1006571. doi:10.1371/journal.pcbi.1006571.

Kumar, B.V., W. Ma, M. Miron, T. Granot, R.S. Guyer, D.J. Carpenter, T. Senda, X. Sun, S.-H. Ho, H. Lerner, A.L. Friedman, Y. Shen, and D.L. Farber. 2017. Human Tissue-Resident Memory T Cells Are Defined by Core Transcriptional and Functional Signatures in Lymphoid and Mucosal Sites. *Cell Rep.* 20:2921–2934. doi:10.1016/j.celrep.2017.08.078.



Laydon, D.J., A. Melamed, A. Sim, N.A. Gillet, K. Sim, S. Darko, J.S. Kroll, D.C. Douek, D.A. Price, C.R.M. Bangham, and B. Asquith. 2014. Quantification of HTLV-1 clonality and TCR diversity. *PLoS Comput. Biol.* 10:e1003646. doi:10.1371/journal.pcbi.1003646.

van der Leun, A.M., D.S. Thommen, and T.N. Schumacher. 2020. CD8+ T cell states in human cancer: insights from single-cell analysis. *Nat. Rev. Cancer.* 20:218–232. doi:10.1038/s41568-019-0235-4.

Li, H., A.M. van der Leun, I. Yofe, Y. Lubling, D. Gelbard-Solodkin, A.C.J. van Akkooi, M. van den Braber, E.A. Rozeman, J.B.A.G. Haanen, C.U. Blank, H.M. Horlings, E. David, Y. Baran, A. Bercovich, A. Lifshitz, T.N. Schumacher, A. Tanay, and I. Amit. 2019. Dysfunctional CD8 T Cells Form a Proliferative, Dynamically Regulated Compartment within Human Melanoma. *Cell.* 176:775-789.e18. doi:10.1016/j.cell.2018.11.043.

Love, M.I., W. Huber, and S. Anders. 2014. Moderated estimation of fold change and dispersion for RNA-seq data with DESeq2. *Genome Biology.* 15:550. doi:10.1186/s13059-014-0550-8.

Magnuson, A.M., E. Kiner, A. Ergun, J.S. Park, N. Asinovski, A. Ortiz-Lopez, A. Kilcoyne, E. Paoluzzi-Tomada, R. Weissleder, D. Mathis, and C. Benoist. 2018. Identification and validation of a tumor-infiltrating Treg transcriptional signature conserved across species and tumor types. *Proc Natl Acad Sci U S A.* 115:E10672–E10681. doi:10.1073/pnas.1810580115.

Moskophidis, D., F. Lechner, H. Pircher, and R.M. Zinkernagel. 1993. Virus persistence in acutely infected immunocompetent mice by exhaustion of antiviral cytotoxic effector T cells. *Nature.* 362:758–761. doi:10.1038/362758a0.

Pauken, K.E., M.A. Sammons, P.M. Odorizzi, S. Manne, J. Godec, O. Khan, A.M. Drake, Z. Chen, D.R. Sen, M. Kurachi, R.A. Barnitz, C. Bartman, B. Bengsch, A.C. Huang, J.M. Schenkel, G. Vahedi, W.N. Haining, S.L. Berger, and E.J. Wherry. 2016. Epigenetic stability of exhausted T cells limits durability of reinvigoration by PD-1 blockade. *Science.* 354:1160–1165. doi:10.1126/science.aaf2807.

Ribas, A., and J.D. Wolchok. 2018. Cancer immunotherapy using checkpoint blockade. *Science.* 359:1350–1355. doi:10.1126/science.aar4060.

Sade-Feldman, M., K. Yizhak, S.L. Bjorgaard, J.P. Ray, C.G. de Boer, R.W. Jenkins, D.J. Lieb, J.H. Chen, D.T. Frederick, M. Barzily-Rokni, S.S. Freeman, A. Reuben, P.J. Hoover, A.-C. Villani, E. Ivanova, A. Portell, P.H. Lizotte, A.R. Aref, J.-P. Eliane, M.R. Hammond, H. Vitzthum, S.M. Blackmon, B. Li, V. Gopalakrishnan, S.M. Reddy, Z.A. Cooper, C.P. Paweletz, D.A. Barbie, A. Stemmer-Rachamimov, K.T. Flaherty, J.A. Wargo, G.M. Boland, R.J. Sullivan, G. Getz, and N. Hacohen. 2018. Defining T Cell States Associated with Response to Checkpoint Immunotherapy in Melanoma. *Cell.* 175:998-1013.e20. doi:10.1016/j.cell.2018.10.038.

Schietinger, A., A. Arina, R.B. Liu, S. Wells, J. Huang, B. Engels, V. Bindokas, T. Bartkowiak, D. Lee, A. Herrmann, D.W. Piston, M.J. Pittet, P.C. Lin, T. Zal, and H. Schreiber. 2013. Longitudinal confocal microscopy imaging of solid tumor destruction following adoptive T cell transfer. *Oncoimmunology.* 2:e26677. doi:10.4161/onci.26677.



Stuart, T., A. Butler, P. Hoffman, C. Hafemeister, E. Papalexi, W.M. Mauck, Y. Hao, M. Stoeckius, P. Smibert, and R. Satija. 2019. Comprehensive Integration of Single-Cell Data. *Cell*. 177:1888-1902.e21. doi:10.1016/j.cell.2019.05.031.

Tirosh, I., B. Izar, S.M. Prakadan, M.H. Wadsworth, D. Treacy, J.J. Trombetta, A. Rotem, C. Rodman, C. Lian, G. Murphy, M. Fallahi-Sichani, K. Dutton-Regester, J.-R. Lin, O. Cohen, P. Shah, D. Lu, A.S. Genshaft, T.K. Hughes, C.G.K. Ziegler, S.W. Kazer, A. Gaillard, K.E. Kolb, A.-C. Villani, C.M. Johannessen, A.Y. Andreev, E.M. Van Allen, M. Bertagnolli, P.K. Sorger, R.J. Sullivan, K.T. Flaherty, D.T. Frederick, J. Jané-Valbuena, C.H. Yoon, O. Rozenblatt-Rosen, A.K. Shalek, A. Regev, and L.A. Garraway. 2016. Dissecting the multicellular ecosystem of metastatic melanoma by single-cell RNA-seq. *Science*. 352:189–196. doi:10.1126/science.aad0501.

Wang, J., C.J. Perry, K. Meeth, D. Thakral, W. Damsky, G. Micevic, S. Kaech, K. Blenman, and M. Bosenberg. 2017. UV-induced somatic mutations elicit a functional T cell response in the YUMMER1.7 mouse melanoma model. *Pigment Cell Melanoma Res*. 30:428–435. doi:10.1111/pcmr.12591.

Wolf, D., S. Sopper, A. Pircher, G. Gastl, and A.M. Wolf. 2015. Treg(s) in Cancer: Friends or Foe? *J. Cell. Physiol*. 230:2598–2605. doi:10.1002/jcp.25016.

Wu, T.D., S. Madireddi, P.E. de Almeida, R. Banchereau, Y.-J.J. Chen, A.S. Chitre, E.Y. Chiang, H. Iftikhar, W.E. O’Gorman, A. Au-Yeung, C. Takahashi, L.D. Goldstein, C. Poon, S. Keerthivasan, D.E. de Almeida Nagata, X. Du, H.-M. Lee, K.L. Banta, S. Mariathan, M. Das Thakur, M.A. Huseni, M. Ballinger, I. Estay, P. Caplazi, Z. Modrusan, L. Delamarre, I. Mellman, R. Bourgon, and J.L. Grogan. 2020. Peripheral T cell expansion predicts tumour infiltration and clinical response. *Nature*. 579:274–278. doi:10.1038/s41586-020-2056-8.

Yost, K.E., A.T. Satpathy, D.K. Wells, Y. Qi, C. Wang, R. Kageyama, K.L. McNamara, J.M. Granja, K.Y. Sarin, R.A. Brown, R.K. Gupta, C. Curtis, S.L. Bucktrout, M.M. Davis, A.L.S. Chang, and H.Y. Chang. 2019. Clonal replacement of tumor-specific T cells following PD-1 blockade. *Nat. Med*. 25:1251–1259. doi:10.1038/s41591-019-0522-3.

Zhang, F., K. Wei, K. Slowikowski, C.Y. Fonseka, D.A. Rao, S. Kelly, S.M. Goodman, D. Tabechian, L.B. Hughes, K. Salomon-Escoto, G.F.M. Watts, A.H. Jonsson, J. Rangel-Moreno, N. Meednu, C. Rozo, W. Apruzzese, T.M. Eisenhaure, D.J. Lieb, D.L. Boyle, A.M. Mandelin, Accelerating Medicines Partnership Rheumatoid Arthritis and Systemic Lupus Erythematosus (AMP RA/SLE) Consortium, B.F. Boyce, E. DiCarlo, E.M. Gravallese, P.K. Gregersen, L. Moreland, G.S. Firestein, N. Hachohen, C. Nusbaum, J.A. Lederer, H. Perlman, C. Pitzalis, A. Filer, V.M. Holers, V.P. Bykerk, L.T. Donlin, J.H. Anolik, M.B. Brenner, and S. Raychaudhuri. 2019. Defining inflammatory cell states in rheumatoid arthritis joint synovial tissues by integrating single-cell transcriptomics and mass cytometry. *Nat. Immunol*. 20:928–942. doi:10.1038/s41590-019-0378-1.

Zhang, L., X. Yu, L. Zheng, Y. Zhang, Y. Li, Q. Fang, R. Gao, B. Kang, Q. Zhang, J.Y. Huang, H. Konno, X. Guo, Y. Ye, S. Gao, S. Wang, X. Hu, X. Ren, Z. Shen, W. Ouyang, and Z. Zhang. 2018. Lineage tracking reveals dynamic relationships of T cells in colorectal cancer. *Nature*. 564:268–272. doi:10.1038/s41586-018-0694-x.

Zheng, C., L. Zheng, J.-K. Yoo, H. Guo, Y. Zhang, X. Guo, B. Kang, R. Hu, J.Y. Huang, Q. Zhang, Z. Liu, M. Dong, X. Hu, W. Ouyang, J. Peng, and Z. Zhang. 2017. Landscape of Infiltrating T Cells in Liver Cancer Revealed by Single-Cell Sequencing. *Cell*. 169:1342-1356.e16. doi:10.1016/j.cell.2017.05.035.

## Figures and Tables

**Table 1 Demographics and clinical features of patients included in the study.** All patients are stage IV melanoma (Gershenwald et al., 2017). *Tumor burden* is defined based on a lesion volume threshold of 2 cm<sup>3</sup>. *Disease duration* corresponds to the time between the diagnosis of metastatic disease and sample collection. *Response* is defined according to the RECIST guidelines (v1.1, (Eisenhauer et al., 2009)). N.A. = not applicable, P.D. = progressive disease, P.R. = partial response. *Tumor burden* was calculated using the formula  $(4/3)\pi r^3$ , where r is the maximum radius of each metastasis, except for three lesions for which the formula for the volume of an ellipsoid was deemed more appropriate ( $V=4/3\pi*L/2*H/2*W/2$ ).

## Figure Legends

**Fig. 1 Detection of clonally-expanded TILs in the circulation of melanoma patients.** **A**, dot plots displaying indexes of diversity and species richness for tumor and blood TCR $\alpha\beta$  repertoires of individual patients. Horizontal bars indicate medians. Statistical significance was determined using Wilcoxon rank-sum test. **B**, hierarchical clustering of tumor and blood TCR $\alpha\beta$  repertoires based on clonal size distribution. Red = blood, Grey = tumor. **C**, bar graph displaying the proportion of TCR $\alpha\beta$  repertoire space occupied by the top n clonotypes (bins in legend) for the tumor samples of individual patients. **D**, alluvial plots displaying the frequency of the top 20 most expanded TIL clonotypes in blood and tumor for individual patients. **E-F**, tSNE plot of TILs (**B**) and circulating T cells (**C**) divided by

expression of CD8A (normalized counts > 1) and CD4 (normalized counts > 1) for one representative patient. T cells expressing TCRs expanded in the tumor are highlighted in blue. **D**, table displaying the absolute number and frequency of tumor-resident and blood-derived CD8 T cells expressing a TCR expanded in the tumor for each patient. Bold indicates patients in which the absolute number of blood-derived T cells with a TCR expanded in the tumor (circulating TILs) was deemed large enough for subsequent analyses. **E**, percentage of CD4+ (white) and CD8+ (grey) T cells among clonally expanded T cells in tumor and circulating TILs. Each data point represents the average for one patient. Data represent mean +/- standard deviation. Statistical significance was determined using t test with Bonferroni-Dunn correction for multiple comparisons. **F** scatter plots showing the relationship of the frequency of circulating TILs and disease duration. Adjusted R-squared and F test p value are shown.

**Fig. 2 Cytotoxic profile of circulating TILs.** **A**, tSNE plot of CD8 T cells from 11 patients, split by tissue of origin and coloured by cluster. Clustering was obtained with a SNN modularity optimization-based algorithm (k parameter = 5, resolution = 0.5). **B**, tSNE plot of CD8 T cells from 11 patients, split by tissue of origin and coloured by expression of a TCR expanded in the tumor (blue, threshold for expansion as in Supplementary Fig 1), or not (gold). **C**, tSNE plots coloured by scaled expression of indicated genes. **D**, clustered heatmap displaying the degree of overlap between lists of cluster markers (rows) and gene sets derived from published studies of melanoma TIL transcriptome (1 = Li et al. 2019, 2 = Sade-Feldman et al. 2018, 3 = Tirosh et al. 2016). **E**, heatmap of differentially expressed genes between circulating TILs and blood T cells with a TCR not expanded in the tumor with a delta % of expressing cells between the two groups of at least +/-10%. Rows

represent genes ordered by delta % of expressing cells. Columns represent individual cells grouped by identity class as indicated on the horizontal bars. Values are scaled and mean-centered log<sub>2</sub>-transformed gene counts. For visualization purposes, the dataset was randomly down sampled to include 1000 cells. Values are scaled and mean-centered log<sub>2</sub>-transformed gene counts.

**Fig. 3 Circulating TILs reflect features of clonally expanded tumor-infiltrating T cells.** **A**, tSNE plots highlighting tumor-infiltrating cells with a TCR clonally expanded in the tumor (dark blue) or singletons (light blue) and blood-derived cells with a TCR clonally expanded in blood (dark red) or singletons (tomato red). **B**, diagram illustrating the definition of expanded TIL gene sets and TIL-specific gene sets. **C**, clustered heatmap of the similarity matrix between expanded TIL gene sets of individual patients. **D**, quantification of the expression of expanded TIL gene sets in circulating TILs (blue) versus other circulating T cells (red) for each patient. Statistical significance was determined using Wilcoxon rank-sum test. **E**, quantification of the expression of tumor specific gene sets in circulating TILs (blue) versus other circulating T cells (red) for each patient. Statistical significance was determined using the Wilcoxon rank-sum test. **F-G** for selected genes belonging the expanded TIL gene sets of at least three patients, expression is compared between tumor-resident clonally expanded TILs, circulating TILs and the rest of blood CD8 T cells. **F**, heatmap displaying expression of expanded TIL genes differentially expressed (left panel) or not (right panel) between circulating TILs and other circulating T cells. **G** heatmap displaying expression of tumor-specific genes differentially expressed (left panel) or not (right panel) between circulating TILs and other circulating T cells. For heatmaps, values are scaled and mean-centered log<sub>2</sub>-transformed gene counts. Statistical significance was

determined with Wilcoxon rank-sum tests Bonferroni-corrected by the number of genes in the dataset (17.045) multiplied by the number of comparisons (3).

**Fig. 4 Tumor-blood sharing as a predictor of cytotoxic phenotype.** **A**, tSNE plot of tumor CD8 T cells coloured by expression of a blood-tumor sharing score (left) calculated for each clonal group in the tumor (= cells sharing the same TCR) and volcano plot representing the Spearman's rho coefficients and the adjusted p values of the correlations between sharing score and gene expression for CD8 TILs from 12 pooled patients (right). **B**, tSNE plot of tumor CD8 T cells coloured by expression of an expansion score (left) and volcano plot representing the Spearman's rho coefficients and the adjusted p values of the correlations between expansion score and gene expression for CD8 TILs from 12 pooled patients (right). **C**, scatter plots showing the relationship between expansion score in the blood (left) or in the tumor (right) and degree of sharing across organ. Each dot represents the cumulative scores for each patient. Adjusted R-squared and F test p value are shown. **D**, table summarizing the number of cells expressing selected tumor exclusive (T. e.) and shared (Sh.) clonotypes in tumor and blood for the indicated patient (top). Table summarizing the number of cells expressing selected highly expanded (Hi) and lowly expanded (Lo) tumor-exclusive clonotypes in tumor and blood for the indicated patient (bottom). The indicated cells are mapped on a tSNE plot split by organ. **E**, **F** the indicated cells are mapped on a tSNE plot split by organ. **G**, Euclidean distances between the average of the PCA embeddings of each cell in the tumor exclusive versus shared clonal groups and highly expanded versus lowly expanded clonal groups. Distances were calculated using the PCs that were determined to be statistically significant in an elbow plot (8 PCs). Statistical significance between groups was determined using the Mann-Whitney test. **H**,

heatmap displaying expression of genes differentially expressed between tumor exclusive versus shared clonal groups (rows, as in **E**). Cells are grouped and colour-coded according to the clonal group to which they belong. Differential expression was established with the Wilcoxon rank sum test, retaining genes with an adjusted p value  $< 0.05$ . Values are scaled and mean-centered log<sub>2</sub>-transformed gene counts. **I**, scatter plots showing the relationship of exhaustion signature (left) or cytotoxicity signature (right) between tumor infiltrating CD8 T cells and blood-derived circulating TILs. Adjusted R-squared and F test p value are shown.

**Figure 5. Features associated with blood-tumor sharing are highly expressed in the tissue of two patients who responded to immunotherapy.** **A**, tSNE plots of blood and tumor T cells from patient Mel-UT-1 highlighting tumor-infiltrating cells with a TCR clonally expanded in the tumor and tumor-exclusive (dark blue) or shared with blood (aqua). **B**, quantification of the expression of gene sets associated with response to immunotherapy or progression as described by (Sade-Feldman et al. Cell 2019) in tumor-resident cells indicated in **A**. Statistical significance was determined using Wilcoxon rank-sum test. **C**, top, tSNE plot of CD8 T cells from 2 patients, split by tissue of origin and coloured by cluster. Clustering was obtained with a SNN modularity optimization-based algorithm (k parameter = 5, resolution = 0.5). Bottom, tSNE plot of CD8 T cells from 2 patients, split by tissue of origin and coloured by expression of a TCR expanded in tissue (blue), or not (gold). **D**, heatmap of genes previously established to be positively and negatively correlated with TCR sharing score at an adjusted Log(p value)  $\leq -100$  (as in Fig. 5A). Rows represent genes grouped by correlation with TCR sharing. Columns represent individual cells grouped by cluster identity (horizontal bars), with clusters ordered by

decreasing percentage of blood cells. Values are scaled and mean-centered log<sub>2</sub>-transformed gene counts. Pie charts stacked on top of the grouping colour bar indicate tumor vs blood composition and expanded TIL composition for each cluster. E, tSNE plot of CD8 T cells from 2 patients, split by tissue of origin and coloured by scaled expression of the indicated genes.

**Fig. S1 Individual thresholds of clonal expansion in the tumor.** Bar graphs displaying the frequency of TILs expressing a given TCR $\alpha\beta$  clonotype on the y axis, and individual TIL clonotypes ordered by increasing frequency on the x axis, for individual patients.

**Fig. S2 Individual thresholds of clonal expansion in blood.** Bar graphs displaying the frequency of TILs expressing a given TCR $\alpha\beta$  clonotype on the y axis, and individual TIL clonotypes ordered by increasing frequency on the x axis, for individual patients.

**Fig. S3 Co-expression of KLRD1 and CD74 enriches for circulating TILs.** **A**, workflow for identification of gene markers of circulating TILs. Singleton and paired gene markers of circulating TILs were identified from the blood of each patient using COMET. Gene marker pairs detected in most patients were chosen and blood T cells were classified based on co-expression of the selected gene markers. The percentage of circulating TILs in cells positive and negative for the selected gene markers was compared for each patient. **B**, table summarizing the rank of the gene marker pair *KLRD1-CD74*, the q value and the total number of gene marker pairs identified by the COMET analysis. N.D. indicates that the gene marker pair *KLRD1-CD74* was not detected in that patient. N.A. = not applicable. **C**, heatmap of the reverse rank (rank \* -1, rows) of singleton gene markers of tumor directed T cells that were shared by at least 5 out of 7 patients (columns), ordered by the average across patients. For pairs not detected in a specific patient, a reverse rank of -200 was

assigned. Arrows indicate *KLRDI* and *CD74*, detected by both the singleton and paired gene marker analysis. **D**, scatter plots displaying the relationship between the integrated (Stuart et al., 2019) expression of *KLRDI* and *CD74* transcripts in each patient. Dashed boxes indicate double positive cells, with expression of *KLRDI*  $\geq 1.5$  and *CD74*  $\geq 3$ . **E**, percentage of cells expressing a TCR expanded in the tumor among cells that are positive or negative for the *KLRDI-CD74* combination in each patient. **F**, percentage of cells expressing a TCR expanded in the tumor among cells that are positive or negative for *PDCDI* expression in each patient. Statistical significance was determined using paired t tests. **G**, Pie charts displaying the percentage composition in terms of TCRs expanded in the tumor, shared but not expanded in the tumor, and not shared with the tumor for blood T cells classified as positive or negative for the *KLRDI-CD74* marker combination. Percentages are calculated on the sum of all blood CD8 T cells from the 7 patients.



# Figure 1

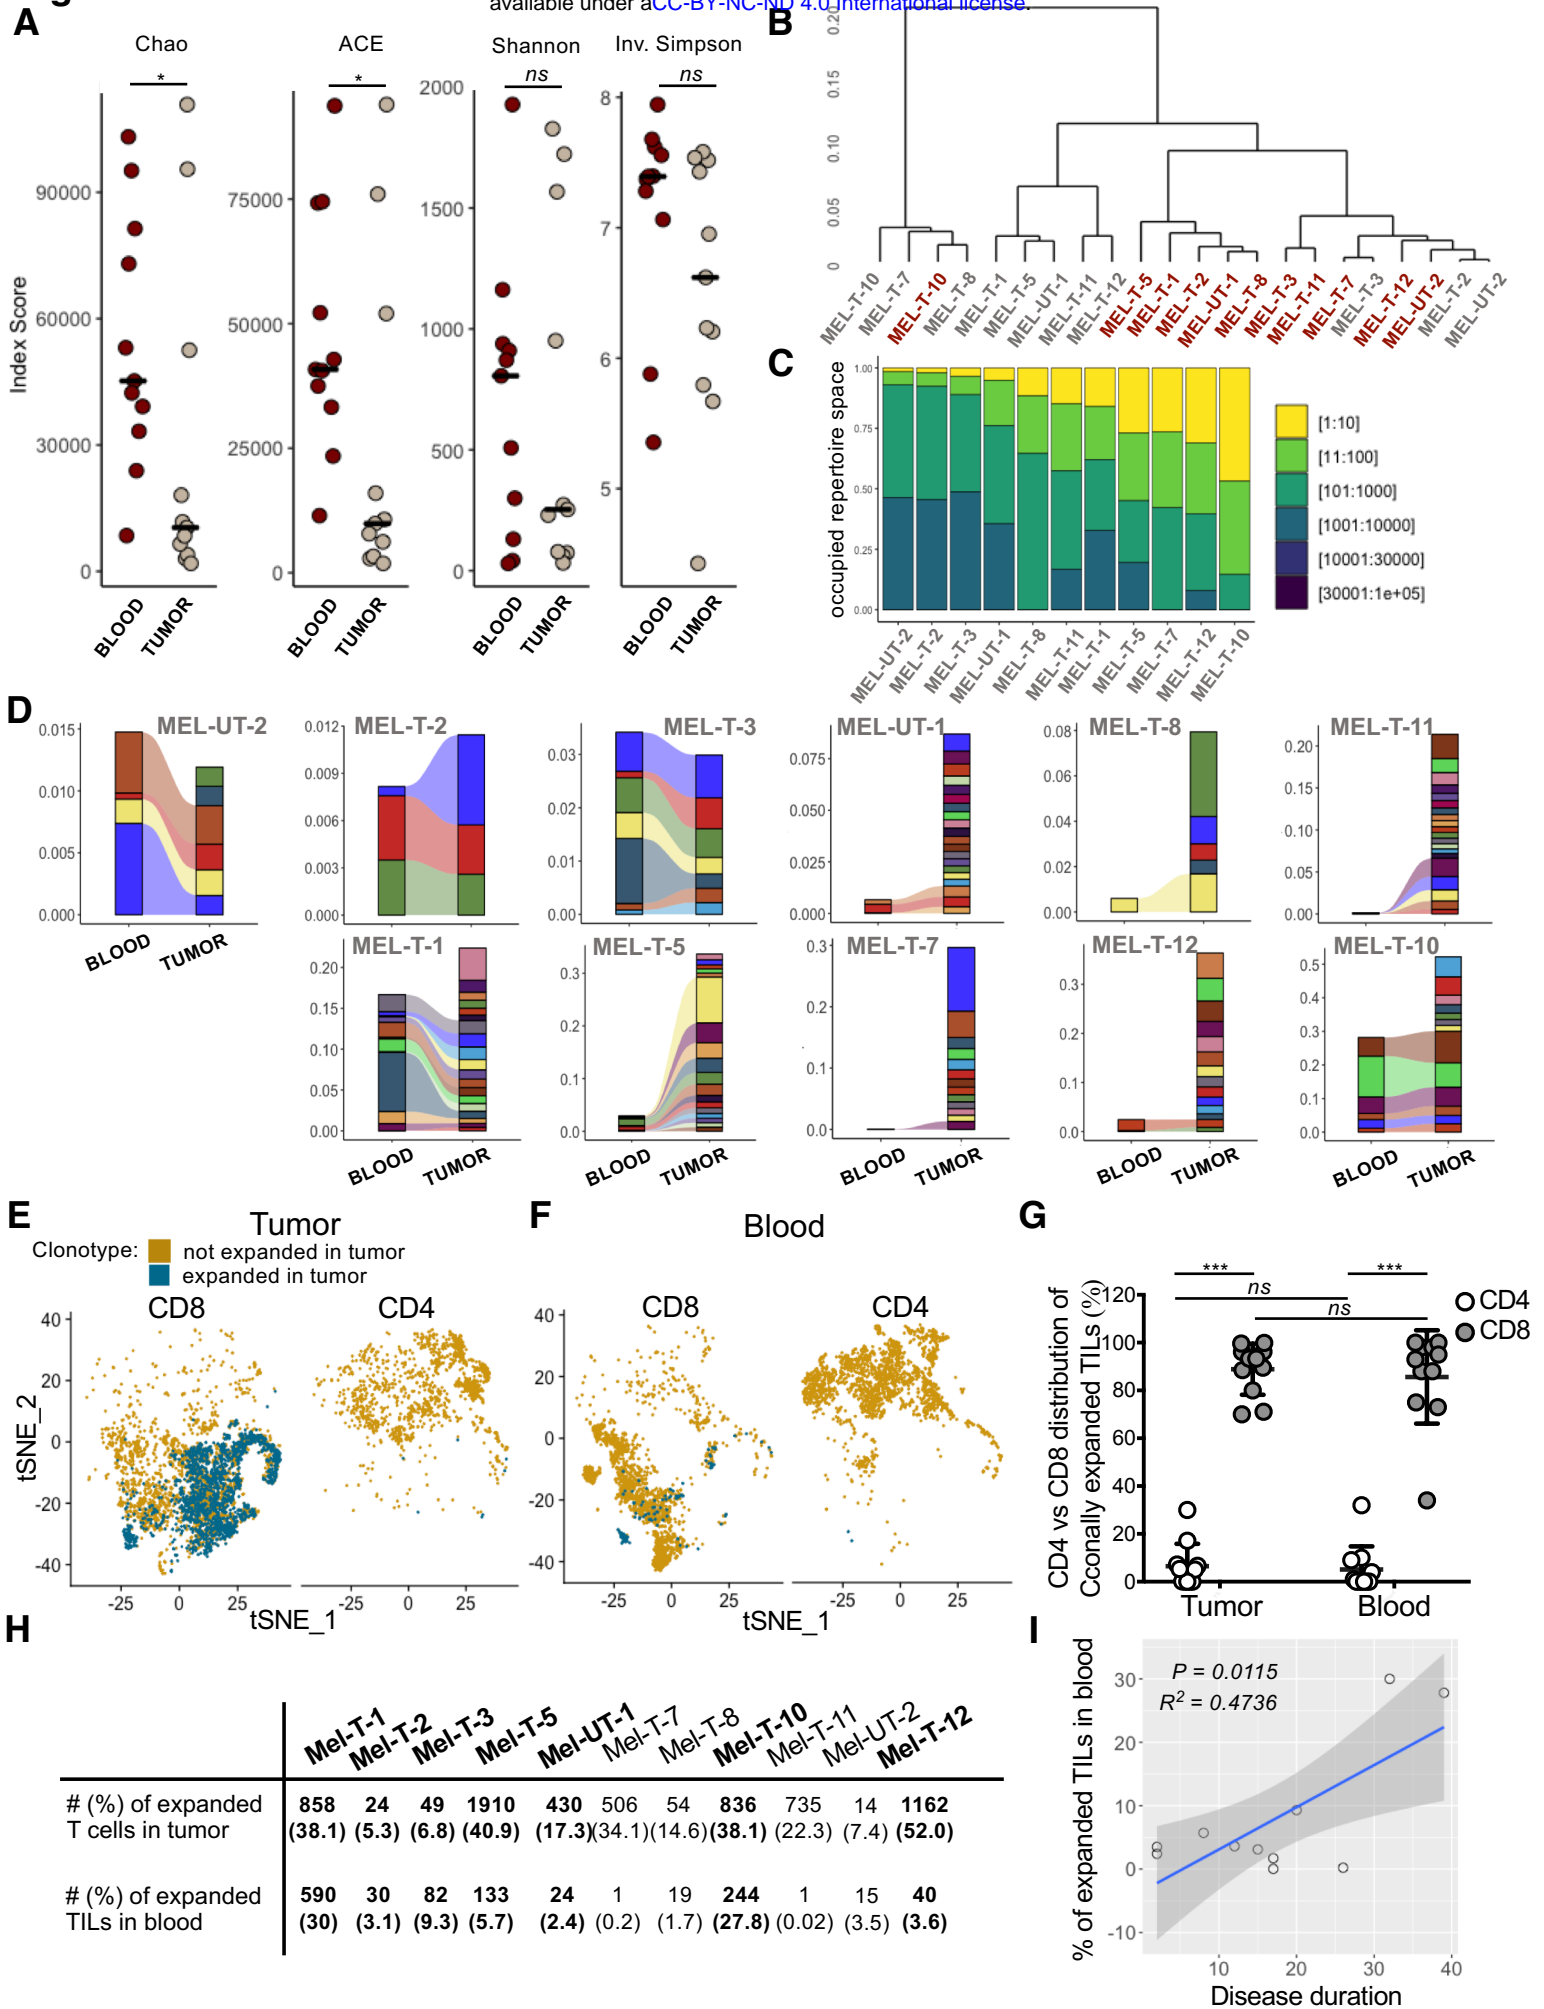

## Figure 2

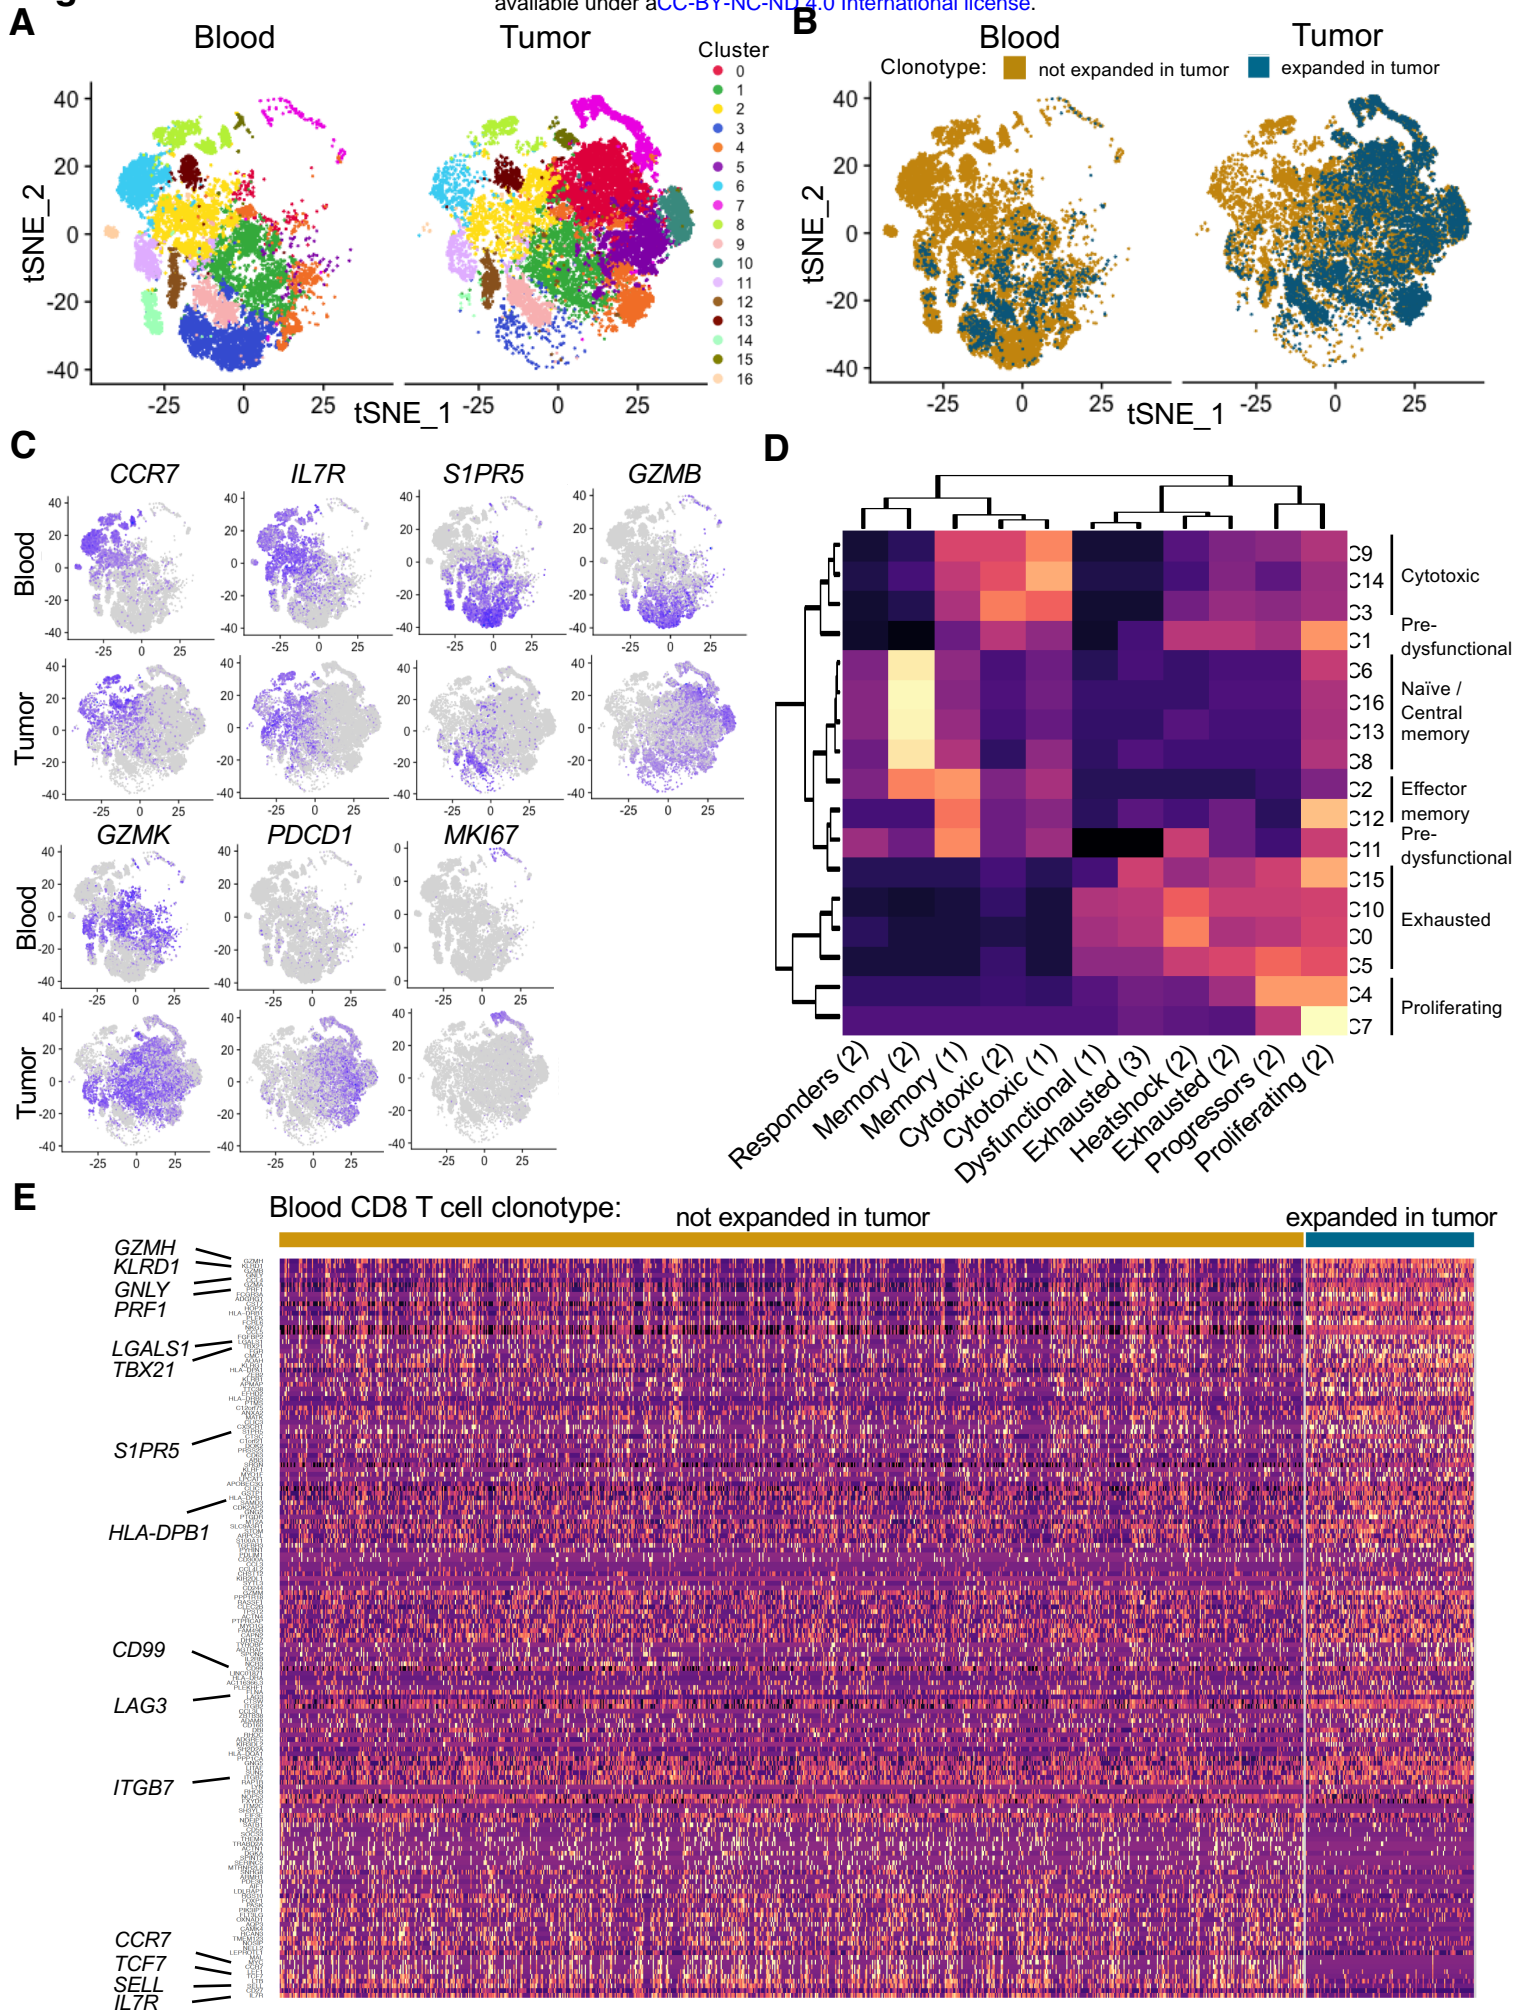

## Figure 3

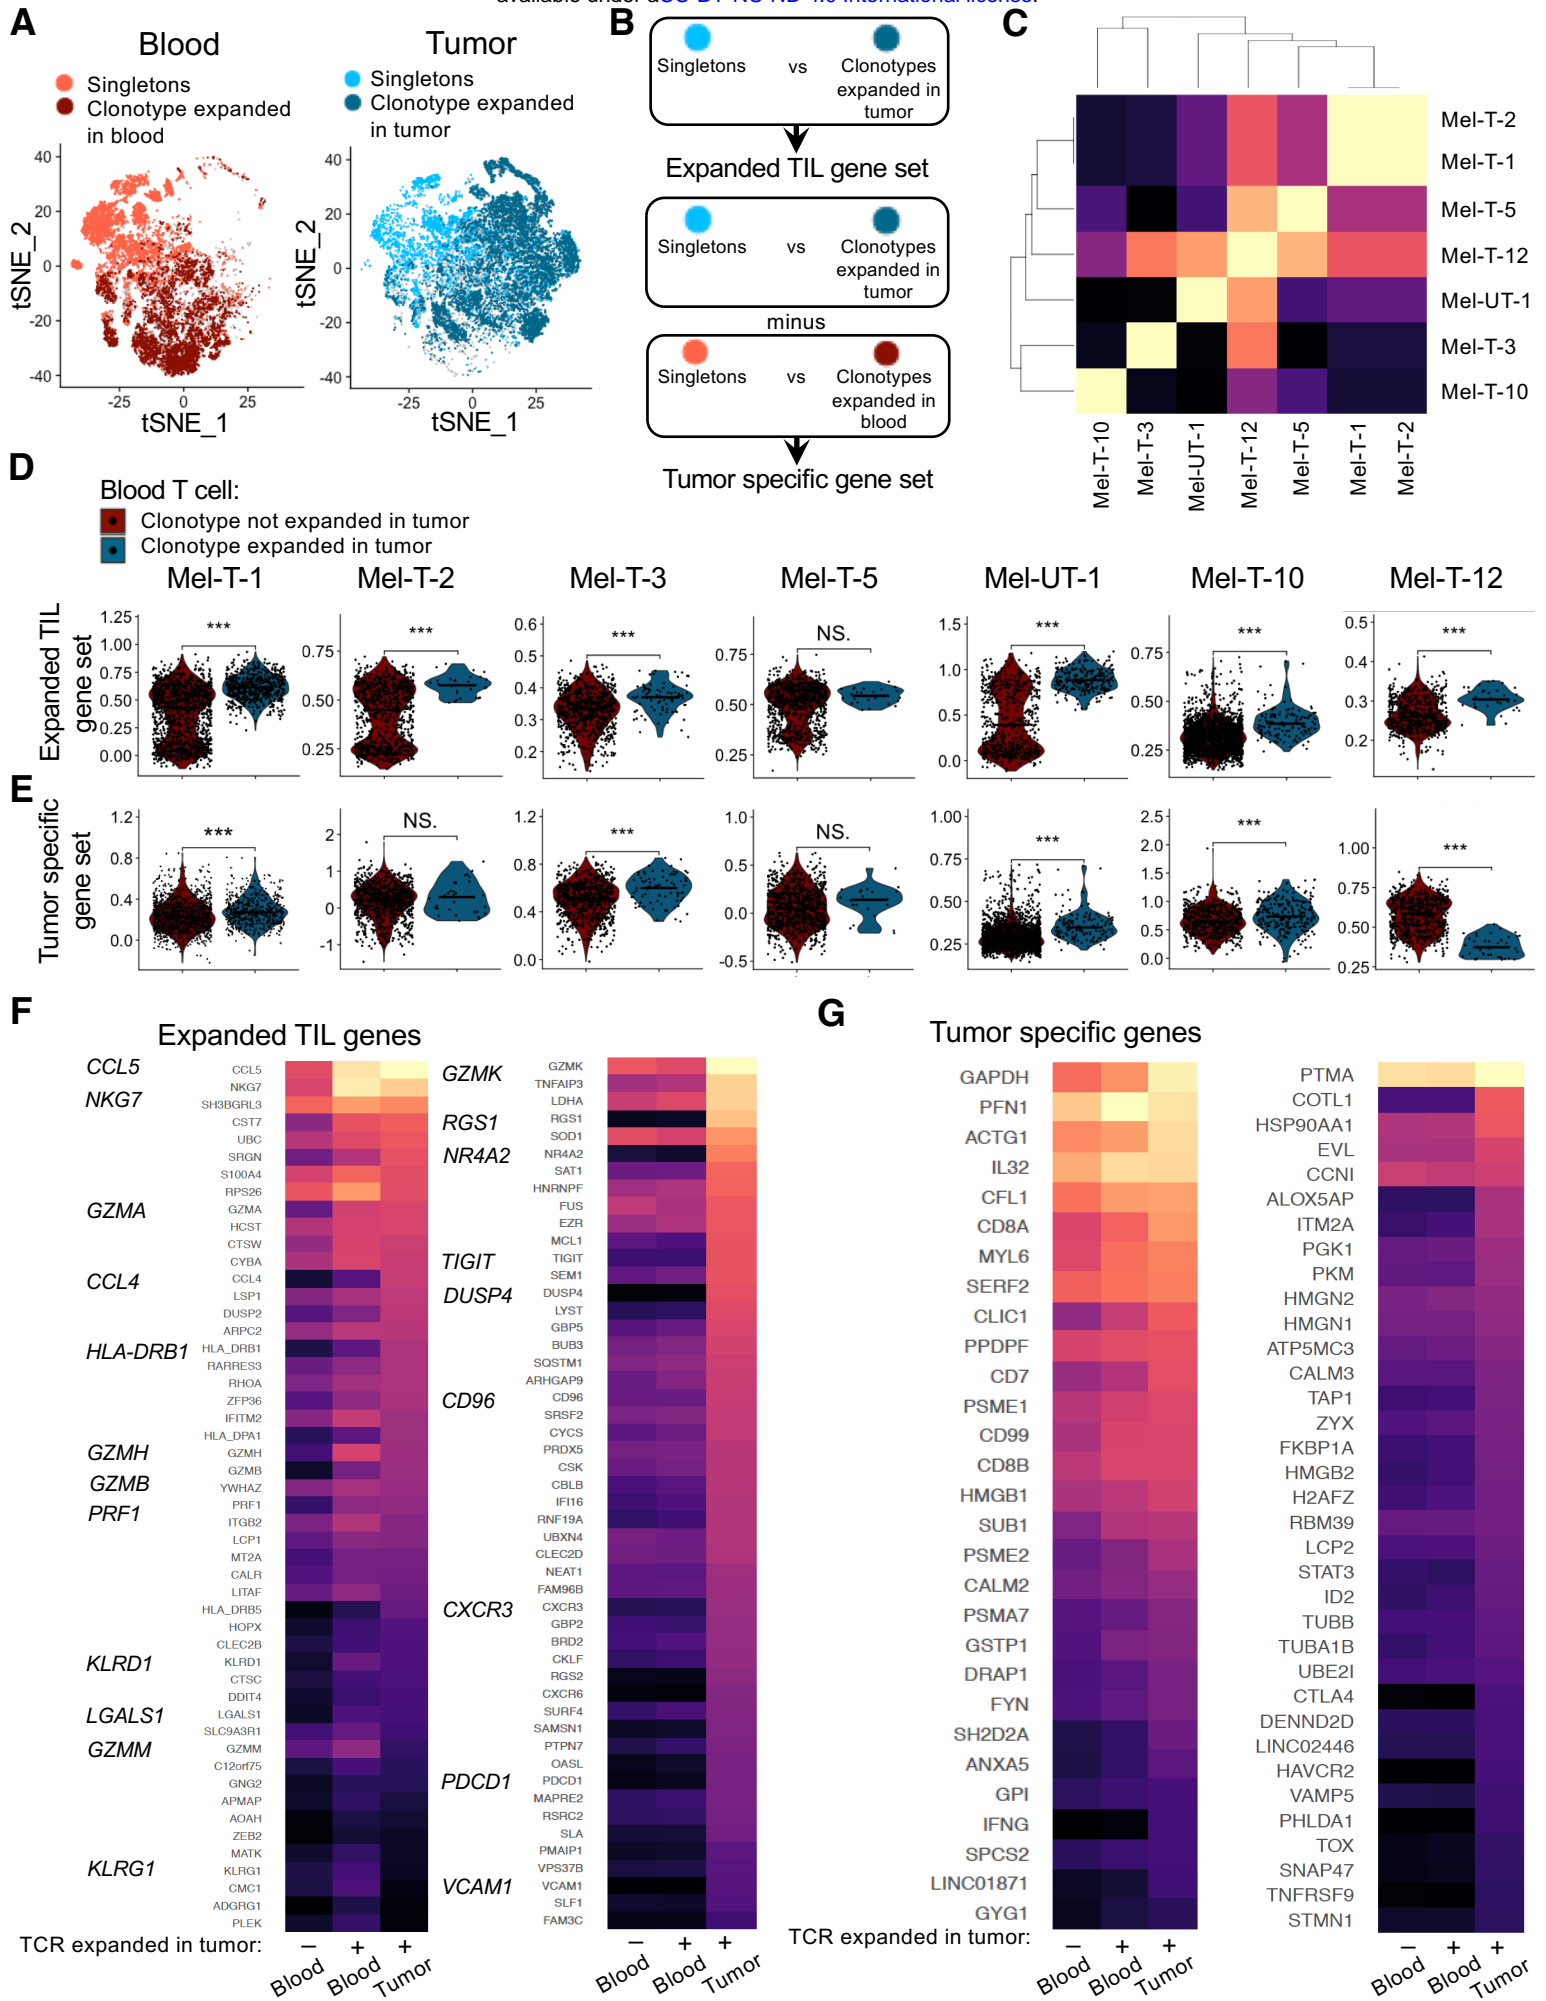



## Figure 4

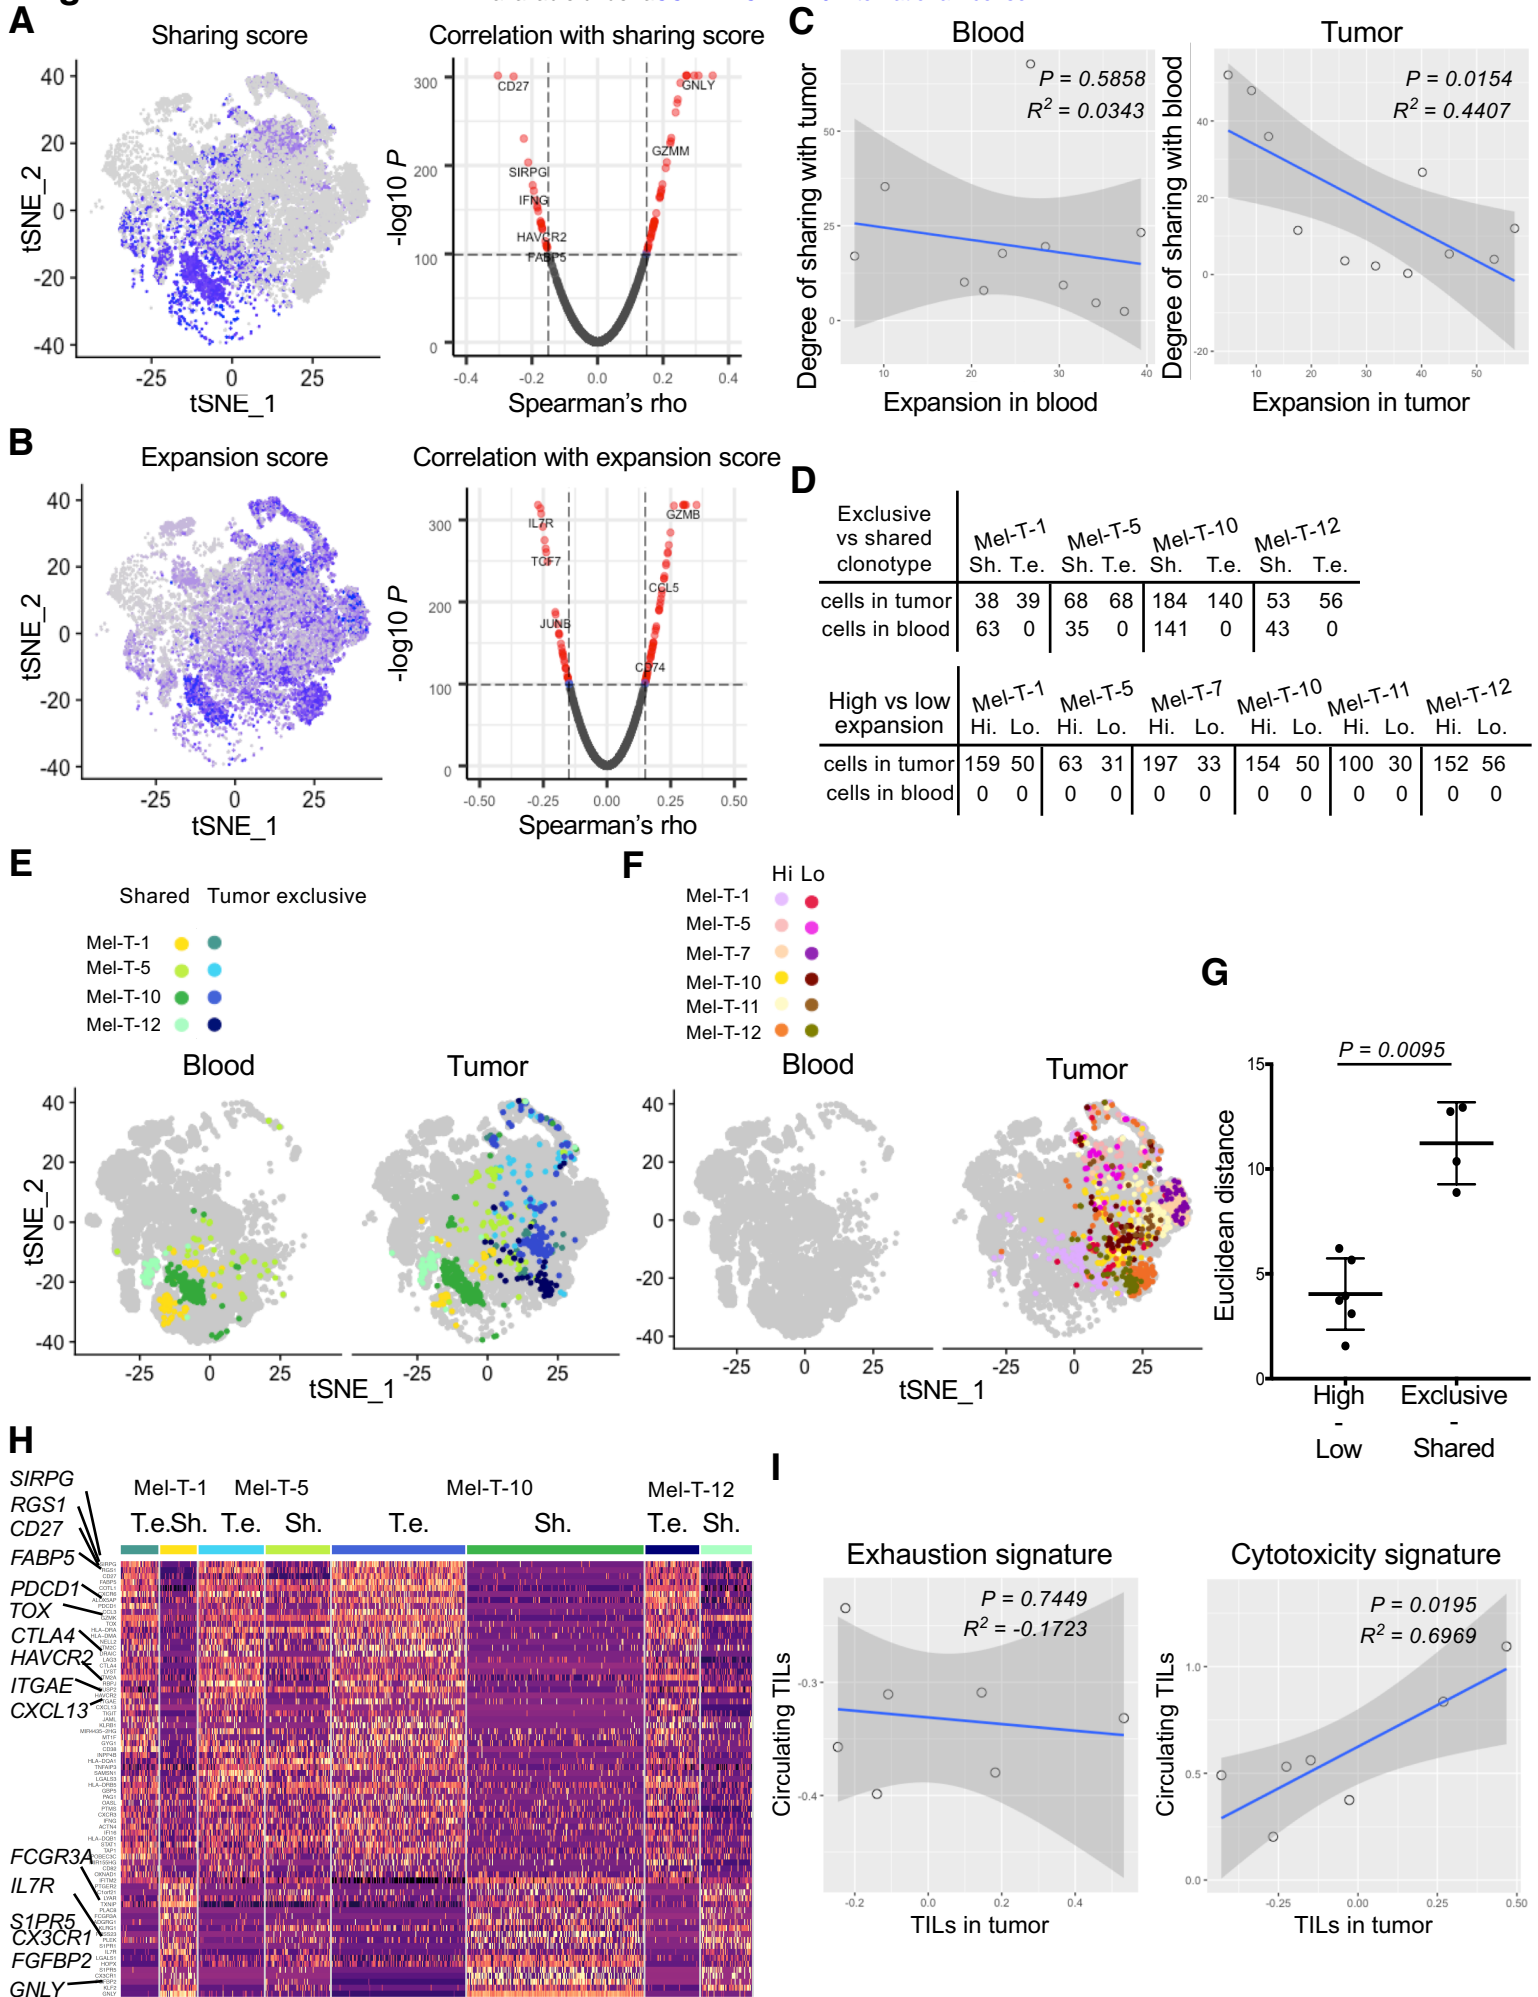

## Figure 5

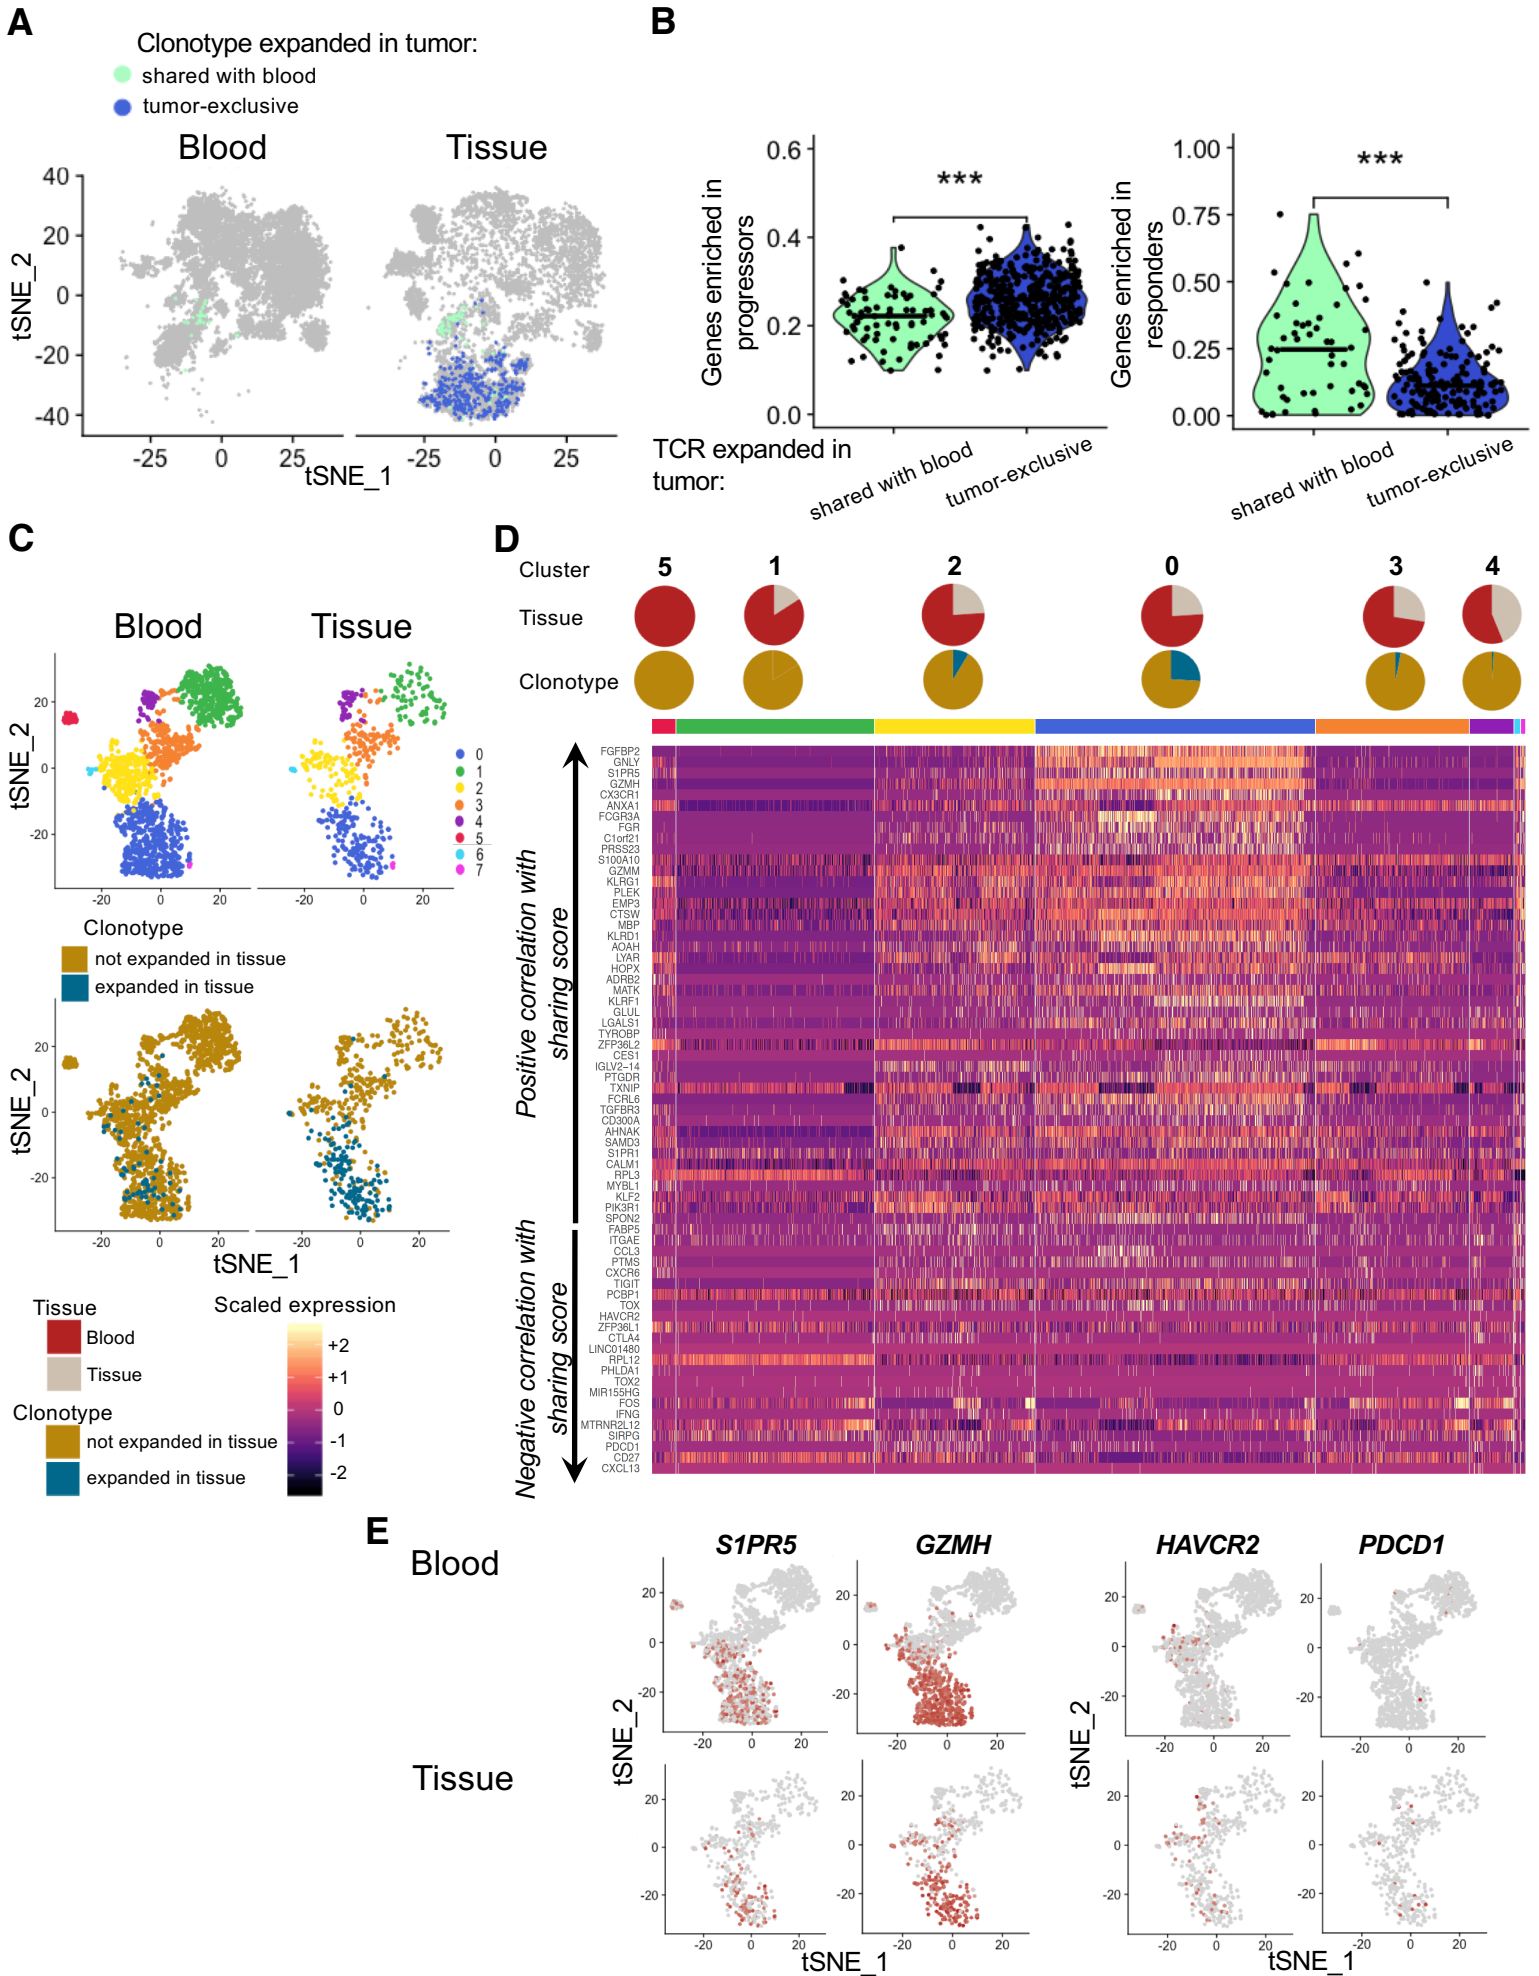

| Patient I.D. | Sex | Age | Lesion location | BRAF/NRAS/c-Kit mutation | Sun exposure       | Tumor burden | Disease duration (mo) |  | ICB history | Most recent ICB infusion  | Response |
|--------------|-----|-----|-----------------|--------------------------|--------------------|--------------|-----------------------|--|-------------|---------------------------|----------|
| Mel-T-1      | F   | 62  | Lymph node      | WT                       | Exposed            | Large        | 32                    |  | Treated     | Pembrolizumab             | P.D.     |
| Mel-T-2      | M   | 40  | Lymph node      | WT                       | Exposed            | Large        | 15 (IIIC)             |  | Treated     | APX005M + Cabiralizumab + | P.D.     |
| Mel-T-3      | M   | 71  | Lymph node      | NRAS                     | Exposed            | Small        | 20 (IIIB)             |  | Treated     | Nivolumab                 | P.D.     |
| Mel-T-5      | F   | 44  | Lymph node      | NRAS                     | Exposed            | Large        | 8                     |  | Treated     | Pembrolizumab             | P.D.     |
| Mel-T-6      | M   | 57  | Lung            | NRAS                     | Exposed            | Small        | 29                    |  | Treated     | Nivolumab + Ipilimumab    | P.R.     |
| Mel-UT-1     | F   | 79  | Lymph node      | BRAF                     | Exposed            | Small        | 2 (IIIB)              |  | Naive       | N.A.                      | N.A.     |
| Mel-T-7      | F   | 40  | Gall bladder    | BRAF                     | Exposed            | Large        | 26                    |  | Treated     | APX005M + Cabiralizumab + | P.D.     |
| Mel-T-8      | M   | 68  | Small bowel     | BRAF                     | Exposed            | Large        | 17                    |  | Treated     | Pembrolizumab             | P.D.     |
| Mel-T-9      | M   | 43  | Lymph node      | BRAF                     | Exposed            | Small        | 22                    |  | Treated     | Nivolumab + Ipilimumab    | P.R.     |
| Mel-T-10     | M   | 61  | Soft tissue     | BRAF                     | Exposed            | Large        | 39                    |  | Treated     | APX005M + Cabiralizumab + | P.D.     |
| Mel-T-11     | M   | 36  | Lymph node      | BRAF                     | Exposed            | Small        | 17                    |  | Treated     | Nivolumab + Ipilimumab    | P.D.     |
| Mel-UT-2     | M   | 71  | Lymph node      | WT                       | Shielded (mucosal) | Large        | 2 (IIID)              |  | Naive       | N.A.                      | N.A.     |
| Mel-T-12     | M   | 34  | Skin metastasis | BRAF                     | Exposed            | Large        | 12                    |  | Treated     | Nivolumab + Ipilimumab    | P.R.     |
